1 Epicuticular wax lipid composition of endemic European *Betula*  
2 species and its application to chemotaxonomy and paleobotany

3

4 J. Weber<sup>1</sup>, L. Schwark<sup>1, 2, \*</sup>

5

6 <sup>1</sup> Department of Organic Geochemistry, Christian-Albrechts-University, Kiel, Germany

7 <sup>2</sup> Department of Chemistry, Curtin University, Perth, Australia

8

9 \*Corresponding author

10 (lorenz.schwark@ifg.uni-kiel.de) (LS)

11

12

13

14

15

16

17

18

19

20

21

22

23

24

## 25 **Abstract**

26 Plants, in particular trees with specific habitat demands are excellent indicators of climate state.  
27 Vegetation successions in subrecent and deep geologic time is recorded in fossil macro-remains  
28 or pollen accumulating in geological archives like limnic and marine sediments, peat bogs and  
29 mires. Birch trees in Europe form a major part in plant successions and constitute the dwarf  
30 species *Betula nana* and *Betula humilis* representing cold-adapted habitats or climates and two  
31 tree birches, *Betula pubescens* and *Betula pendula* characteristic for temperate habitats or  
32 climates. These birch species exhibit highly similar pollen shape and size, preventing their  
33 unambiguous application as paleoclimate/paleovegetation proxies. We here present a  
34 chemotaxonomic differentiation of the four European birch species based on their epicuticular  
35 wax lipids. The dominating lipid classes in epicuticular birch waxes were found to be n-alkanes  
36 (in the range of *n*-C<sub>23</sub> to *n*-C<sub>33</sub>), straight-chain primary alcohols and fatty acids (in the range of  
37 *n*-C<sub>20</sub> to *n*-C<sub>32</sub>), and long-chain wax ester (in the range of *n*-C<sub>38</sub> to *n*-C<sub>46</sub>) in variable amounts  
38 and distributions. When preserved in geological archives these lipids may serve in  
39 paleovegetation/paleoclimate reconstruction. Long-chain wax esters are susceptible to  
40 hydrolysis and upon diagenesis the release of ester-bound alcohols and fatty acids may modify  
41 the distribution pattern of the corresponding primary free lipids. Quantitative analysis of the  
42 hydrolyzable wax ester proportion revealed primary distribution patterns of birch lipids not to  
43 change substantially upon release of bound analogues. The specific composition and  
44 abundance of epicuticular wax lipids facilitates unambiguous chemotaxonomic separation of  
45 the four European birch species. Wax lipid-based discrimination in field application, however,  
46 is complicated by mixing of alkyl lipids derived from different birch species and contribution  
47 of wax lipids from other plants. In cases, where palynology indicates a high contribution of  
48 *Betula* species to European vegetation associations, wax lipids may serve for differentiation of  
49 the species contributing.

50

## 51 **Introduction**

52 Environmental demands, in particular climate, govern the present-day habitat and distribution  
53 of trees, which in turn facilitates determination of climate regimes in the contemporaneous as  
54 well as in the fossil domain. Taxonomy of present-day trees is based on anatomical,  
55 morphological, genetic and biochemical studies, whereby such features in the fossil record are  
56 best preserved in pollen distributions, due to a higher recalcitrance of pollen versus other plant  
57 organs, e.g. leaves and rare findings of other macro-remains, e.g. fruits. Under special  
58 conditions of preservation though fossil remains can be found in sediments dating back to the  
59 Eocene [1]. Paleovegetation and related paleoclimate reconstruction thus heavily relies on  
60 palynology, accompanied by analysis of macro-remains when present. Genetic [2–4] and  
61 biochemical approaches [5–8] are rare, except for molecular and isotopic investigation of  
62 leaf/needle wax, the latter rarely conducted on the species level.

63 Birches (*Betula* L., Betulaceae) are common broadleaf trees and shrubs occurring in diverse  
64 habitats of the boreal and the cold-temperate zones of the Northern Hemisphere [9,10]. Ranging  
65 from temperate zones in Northern America over Eurasia to East Asia and the circumpolar  
66 regions, birches populate different habitats including forests, swamps, tundra and mountainous  
67 terrains [11]. The number of species belonging to the genus *Betula* and their relationships is  
68 still under debate ranging from 30 to 60 different taxa within 4 to 6 subgenera [3,12–15]. Of  
69 these, four *Betula* species are endemic to Europe. The two tree birches, *Betula pubescens*  
70 (downy birch) and *Betula pendula* (silver birch) occur throughout most of Europe, whereby  
71 *Betula pubescens* has a more northerly and easterly distribution, while *Betula pendula* reaches  
72 more southern regions such as the Iberian Peninsula, Italy and Northern Greece [10,15]. Two  
73 dwarf/shrubby birch species, namely *Betula nana* (arctic dwarf birch) and *Betula humilis*

74 (dwarf birch) thrive in Europe as well but are confined to a much smaller growth range. *Betula*  
75 *nana* is preferentially located at higher elevations like the Alps and Carpathian Mountains or  
76 in perennial colder regions like Northern Europe from Iceland over northern Scotland to  
77 Scandinavia [10,15]. *Betula humilis* has a wide distribution from western Germany to eastern  
78 Siberia and Korea, but its occurrence is very scattered with only a few habitats left in Central  
79 Europe [15]. As an important component of plant succession found in highly contrasting  
80 climate and growth regimes, these *Betulaceae* and their respective habitat demands are  
81 sensitive (paleo)climate and (paleo)environmental indicators, provided that they can be  
82 taxonomically differentiated.

83 Recent birch species can be distinguished by their leaf and catkin/fruit shape [16,17] even when  
84 fossilized in sediments, whereby their evolutionary relation and phylogeny is difficult to assess  
85 due to intensive hybridization in nature. Extensive hybridization and introgression has been  
86 investigated not only within a subgenus but also across *Betula* species of different subgenera  
87 [18,19]. Precise classification is complicated by an spatial overlap of natural habitats for  
88 European birch species enabling natural hybridization [20]. The identification of birch remains  
89 in geological archives for paleovegetation reconstruction is limited by a common lack of well-  
90 preserved leaves or catkins occurring in statistically relevant quantities. However, the  
91 identification of birch vegetation over time is of great interest, especially during the Late  
92 Glacial and Early Holocene (approx. 15,000 – 9,000 a BP), to understand early colonization  
93 and forest/shrub expansion in deglaciated landscapes as well as the adaptation of vegetation to  
94 climate variability and perturbation. Macrofossil findings revealed a dominance of tree birches,  
95 like *Betula pubescens*, during temperate phases, whereas upon glacial stages *Betula nana* was  
96 the most abundant birch species, serving as a tundra indicator [21].

97 Most commonly, paleovegetation reconstruction in sedimentary archives like lakes, peats and  
98 bogs is based on palynological approaches, since macro remains are mostly absent [22–30].

99 However, differentiation of birch species by pollen is challenging, due to similar morphological  
100 traits, e.g. shape, diameter and depth of pores in pollen within the genus *Betula*, which leads to  
101 overlap in pollen-size distribution [31–35]. In addition, pollen morphology can also be effected  
102 by the chemicals used upon preparation, pollen maturity, type of mounting medium, but also a  
103 latitudinal and altitudinal effect cannot be excluded (reviewed in 32). In this study we present  
104 the epicuticular leaf wax composition as a complementary proxy for recognition and  
105 differentiation of the four European birches, with the potential to employ the wax distribution  
106 patterns in paleovegetation reconstruction.

107 Terrestrial plant leaves are covered by a hydrophobic barrier to protect against the loss of water  
108 due to evaporation, mechanical damage, ultraviolet radiation and bacterial or fungal pathogens  
109 [36–39]. This barrier consists of an epicuticular wax layer, composed of long-chain alkyl  
110 compounds including amongst others *n*-alkanes, *n*-alcohols, *n*-alkanoic acids, *n*-alkyl esters, *n*-  
111 aldehydes, *n*-ketones and others [37,40]. Their composition is highly variable in quality and  
112 quantity across plant species and therefore has high chemotaxonomic potential [41,42,51,43–  
113 50]. *n*-Alkanes with carbon chain-length between C<sub>25</sub> and C<sub>35</sub> carbon atoms are associated with  
114 higher plants with a strong odd-over-even predominance (expressed as the carbon preference  
115 index - CPI), while their shorter chain homologues (<C<sub>20</sub>), especially *n*C<sub>17</sub>, are mainly found  
116 in aquatic microorganisms [52,53]. Intermediate chain-length *n*-alkanes with C<sub>23</sub> and C<sub>25</sub>  
117 predominance are primarily found in aquatic macrophytes and in mosses of the genus  
118 *Sphagnum* [49,54,55].

119 Both, *n*-alcohols and *n*-alkanoic acids in contrast to the *n*-alkanes hold an even-over-odd  
120 predominance in carbon chain-lengths, which typically ranges from C<sub>20</sub> to C<sub>32</sub> [37]. Alkyl esters  
121 consist of even-numbered *n*-alkanoic acids, which are esterified to even-numbered *n*-alcohols,  
122 generating long-chain aliphatic compounds with on average 38 to 52 carbon atoms [56].  
123 Among these lipid classes, the *n*-alkanes abundances are most frequently reported in vegetation

124 reconstruction, since they are very robust against alteration processes due to the lack of  
125 functional groups. *Betula*-derived *n*-alkanes can be found in a variety of geological archives  
126 including peats, soils, limnic and marine sediments of different ages ranging from modern  
127 times up to several million years [45,57–59] and are easily extracted from sediments and leaves  
128 by geochemical methods [37]. Therefore, most studies conducted to investigate  
129 paleovegetation history employing leaf wax lipids are based on *n*-alkanes [60]. However, the  
130 use of several lipid classes instead of a single will increase the discriminative power and  
131 representativeness of the wax lipid composition. Studies involving *n*-alkanoic acids, *n*-alcohols  
132 or *n*-alkyl ester for paleovegetation reconstruction are highly underrepresented [61,62], as these  
133 lipids are usually not reported from modern plant homologues and their degree of preservation  
134 in natural archives may vary [63]. Following incorporation into soil or sediment, wax esters  
135 can be hydrolysed, releasing free *n*-alcohols and *n*-alkanoic acids. These in turn can be  
136 converted into *n*-alkanes by decarboxylation and reduction, respectively [60]. Diagenetic fate  
137 of functionalized lipids may vary depending on various factors such as oxygen availability and  
138 pH affecting microbial reworking, but the potential of functionalized lipid classes in  
139 paleobotany has been proven for sediments of up to Miocene age [63,64].

140

## 141 **Material and Methods**

### 142 **Leaf samples and collection**

143 Fresh leaf samples were collected in the Botanical Garden at Kiel University in September  
144 2017. Three leaves from each birch species were taken from branches at different sites of the  
145 tree from a height between 1 and 3 m. To avoid contaminations during sampling gloves were  
146 worn and leaves were stored in glass container or aluminium foil until extraction. Subsequently  
147 to sampling leaves were dried at 35°C in an oven for 48h. The mean annual air temperature for

148 Kiel-Holtenau is about 9.34°C and the total annual precipitation is about 744 mm (1987-2018)  
149 (DWD, 2019)

150

## 151 **Lipid extraction**

152 Lipids were extracted by immersing a single leaf sample (0.02 – 0.27 g) for 60 s in a 30-50 ml  
153 hexane/dichloromethane solution (1:1 v/v). The resulting solution was filtered through NaSO<sub>4</sub>,  
154 evaporated under vacuum at 50°C in a Büchi solvent evaporator and transferred into pre-  
155 weighted vials. Per species three leaves were extracted to calculate standard deviation of lipid  
156 concentration and composition. Prior to analyses, an aliquot of the total lipid extract (TLE) was  
157 treated with 35 µl *N,O*-bis(trimethylsilyl)trifluoroacetamide (BSTFA) and 5 µl pyridine at  
158 70°C for 1 h to convert the *n*-alkanoic acids and *n*-alcohols to their corresponding trimethylsilyl  
159 (TMS) derivatives. 10 µg of perdeuterated tetracosane (C<sub>24</sub>), octadecanol (C<sub>18</sub>), and eicosanoic  
160 acid (C<sub>20</sub>) were added as internal standard for quantification. All samples were analysed by gas  
161 chromatography-mass spectrometry (GC/MS).

162

## 163 **Gas chromatography-mass spectrometry (GC-MS)**

164 The wax lipids were analysed using an Agilent 7890A (GC) equipped with an Agilent DB-5  
165 column (30m x 0.25mm x 0.25µm) coupled to an Agilent 5975 B (MS). The oven program  
166 started at 60°C for 4 min, followed by a ramp to 140°C at 10°C/min and subsequently to 325°C  
167 at 3°C, followed by an isothermal period of 45 min. The MS operated with a scanning mass  
168 range of *m/z* 50-850 at an ionization energy of 70 eV. All compounds were identified by using  
169 authentic standards, NIST 14 library or their specific fragmentation pattern.

170

## 171 Leaf wax characteristic calculations

172 The *n*-alkane content of plant species was calculated as µg/g dry weight (d.w.) of leaf based on  
173 mean values of triplicate analysis with standard deviation (Fig. 1).

174 Average chain length (ACL) for *n*-alkanes with 23 to 33 carbon atoms was calculated as:

$$175 \quad ACL = \frac{(23 \times nC_{23} + 25 \times nC_{25} + 27 \times nC_{27} + 29 \times nC_{29} + 31 \times nC_{31} + 33 \times nC_{33})}{(nC_{23} + nC_{25} + nC_{27} + nC_{29} + nC_{31} + nC_{33})}$$

176 with  $C_n$  as relative abundance of *n*-alkanes with the chain length *n* [65]. This proxy is used as  
177 weighted mean of *n*-alkane carbon chain length, which supposed to vary with climate. The  
178 carbon preference index (CPI) outlines the relative abundance of odd-over-even carbon chain  
179 lengths, whereby values >1 indicate a predominance of odd carbon chain lengths homologues.  
180 CPI values for *n*-alkanes with 24 to 34 carbon atoms were calculated according to:

$$181 \quad CPI = 0.5 \times \left[ \frac{(nC_{25} + nC_{27} + nC_{29} + nC_{31} + nC_{33})}{(nC_{26} + nC_{28} + nC_{30} + nC_{32} + nC_{34})} \right. \\ 182 \quad \left. + \frac{(nC_{25} + nC_{27} + nC_{29} + nC_{31} + nC_{33})}{(nC_{24} + nC_{26} + nC_{28} + nC_{30} + nC_{32})} \right]$$

183

## 184 Wax ester quantification

185 For total wax ester quantification, the respective wax ester peaks in the GC-MS chromatograms  
186 were integrated and quantified against an internal standard (deuterated tetracosane). For a wax  
187 ester of the type RCOOR' the diagnostic fatty acid ion is  $RCOOH_2^+$ , indicative for the alkanolic  
188 acid chain length. R'-1<sup>+</sup> derives from the corresponding alcohol moiety, however, its intensity  
189 is low and difficult to detect. Therefore, the diagnostic acid fragments ( $RCOOH_2^+$ ) of peaks  
190 containing co-eluting alkyl esters of identical total mass but variable combinations of alcohol  
191 and alkanolic acid moieties were integrated to determine the percentage of the respective isomer  
192 contribution. Multiplication of isomer percentages by analogue abundances led to the



193 proportion of the esterified acids. The proportional amount of esterified alcohol was obtained  
194 by subtracting the esterified acid from the corresponding total wax ester homologue.

195

## 196 **Results and discussion**

### 197 **Alkyl lipid distribution of plants from Botanical Garden of Kiel**

#### 198 **University**

199 The focus of this study lies on the epicuticular wax composition of the four birches endemic to  
200 Europe. The leaf wax compound classes *n*-alkanes, *n*-alcohols, *n*-alkanoic acid and *n*-alkyl  
201 ester were present in all species at variable composition distributions (S1). Epicuticular alkyl  
202 lipid abundances are reported as  $\mu\text{g/g}$  dry weight (d.w.) of leaf.

203 The lowest total amount of epicuticular waxes was observed in the arctic dwarf birch *B. nana*  
204 with  $538.3 \mu\text{g/g}$  d.w., followed by *B. pendula* with  $1293.8 \mu\text{g/g}$  d.w.,  $3131.7 \mu\text{g/g}$  d.w. in *B.*  
205 *pubescens* and *B. humilis* with  $4187.9 \mu\text{g/g}$  d.w..

206

#### 207 ***n*-alkane of *Betula* epicuticular wax**

208 The carbon atom chain-lengths of *n*-alkanes varied from  $n\text{C}_{23}$  to  $n\text{C}_{33}$  and maximized either at  
209  $n\text{C}_{27}$  or  $n\text{C}_{31}$ . A predominance of  $n\text{C}_{27}$  was noted for *B. humilis* with  $413.2 \pm 91.1 \mu\text{g/g}$  d.w.. In  
210 relative proportion,  $n\text{C}_{27}$  was the dominant *n*-alkane homologue in *B. nana*, though it occurred  
211 in minor absolute concentrations ( $7.8 \pm 2.5 \mu\text{g/g}$  d.w.) only. The *n*-alkanes of two tree birches,  
212 *B. pubescens* and *B. pendula*, maximised at  $n\text{C}_{31}$  with  $799.0 \pm 133.3$  and  $183.0 \pm 103.8 \mu\text{g/g}$  d.w.,  
213 respectively, whereby the latter species additionally contained large proportions of  $n\text{C}_{25}$  and  
214  $n\text{C}_{27}$  alkanes. The average chain-lengths for odd-carbon-numbered *n*-alkanes in the range from  
215  $n\text{C}_{23}$  to  $n\text{C}_{33}$  (ACL<sub>23-33</sub>) varied from 26.7 in *B. humilis* to 29.7 in *B. pubescens*, while *B. pendula*

216 und *B. nana* had intermediate ACL values of 28.0 and 28.5, respectively. As expected, in the  
217 recent leaves a typical odd-over-even predominance was detected, which is expressed in high  
218 CPI values. Highest CPI values were found in *B. pendula* averaging 41.3, followed by *B.*  
219 *pubescens* with 36.4 and *B. nana* with 11.1. The CPI for *B. humilis* could not be calculated due  
220 to the lack of even-numbered *n*-alkanes. The *n*-alkane CPI values of the three species were  
221 high, indicating that there was no significant contamination by diagenetic or petroleum-derived  
222 *n*-alkanes.

223 The birch trees examined in this study grew under identical environmental conditions in the  
224 Botanical Gardens of Kiel University, thus a possible influence of climate or soil condition on  
225 the wax lipid distribution should be identical for each species. The *n*-alkane compositions in  
226 all four *Betula* species exhibited a dominance of longer-chain lengths homologues ( $nC_{27}$ ,  $nC_{29}$ ,  
227  $nC_{31}$ ) with a mean ACL of ca. 28, as typical of deciduous trees [49]. However, some species  
228 had only one dominant homologue (*B. pubescens*, *B. humilis*), whilst others had a more  
229 bimodal distribution with two dominant homologues (*B. nana*, *B. pendula*) (Fig. 1). The ACL  
230 has been used in geological archives as a climate and plant species indicator. For example, it  
231 has been recognized that higher ACL values correlated with higher temperatures in sediments  
232 of Lake Malawi (east Africa), potentially as protection against heat to increase the melting  
233 point of epicuticular waxes [66]. However, Diefendorf et al. 2017 in their compilation study  
234 could not confirm a significant temperature control on ACL neither in  $C_3$  woody plants nor in  
235  $C_3/C_4$  grasses. Higher ACL values, due to a higher proportion of  $nC_{31}$ ,  $nC_{33}$  and partially  $nC_{35}$ ,  
236 were observed in  $C_4$  grasses (*poaceae*) of arid zones in Africa, which distinguished them from  
237  $C_3$  species from Peru and Australia [67]. A correlation between the preferred habitat of the four  
238 birches from our study (arctic/alpine vs. temperate zone) and ACL is not noticeable, since  
239 especially the two cold tolerant dwarf birches showed markedly different *n*-alkane  
240 distributions. However, the measured ACL values were in accordance with the expected values,

241 since no extended long-chain *n*-alkanes with 33 or even 35 carbon atoms, typically for arid  
242 grasses, were found.

243

244 **Fig 1: Distribution of *n*-alkanes, *n*-alcohols, *n*-alkanoic acids and *n*-alkyl esters ( $\mu\text{g/g}$  dry**  
245 **leaf) from epicuticular waxes of four European birch species collected the Botanical**  
246 **Garden of Kiel (Germany). Note the different scale of y-axis for each row.**

247

248

### 249 ***n*-alcohols of *Betula* epicuticular wax**

250 As with the *n*-alkane distribution, a typical terrestrial higher plant pattern was observed,  
251 yielding a strong even-over-odd dominance in carbon chain-lengths [68]. The *n*-alcohol chain-  
252 lengths ranged from  $n\text{C}_{16}$  to  $n\text{C}_{32}$  with a predominance in long-chain alcohols ( $>n\text{C}_{20}$ ) in all  
253 birches. As short chain-lengths *n*-alcohol homologues ( $<n\text{C}_{20}$ ) are primarily synthesised by  
254 microbes or algae [69], we based epicuticular wax analysis on the long-chain homologues. The  
255 primary *n*-alcohols showed the closest range in overall concentrations of all lipid classes (Fig.  
256 1). The cumulative *n*-alcohol concentration extended from  $168.5 \pm 22.0 \mu\text{g/g}$  in *B. pendula* to  
257  $436.4 \pm 84.7 \mu\text{g/g}$  in *B. humilis*. The three birches *B. humilis*, *B. pubescens* and *B. pendula*  
258 revealed a gradually decreasing concentration with increasing chain-lengths, whereby *B.*  
259 *humilis* maximized at  $n\text{C}_{20}$  with  $209.0 \pm 40.2 \mu\text{g/g}$  d.w. and the latter two at  $n\text{C}_{22}$  with  
260  $153.5 \pm 12.9$  and  $79.2 \pm 10.0 \mu\text{g/g}$  d.w., respectively. *B. nana* was characterized by a narrower  
261 distribution, peaking at  $n\text{C}_{28}$  with  $99.7 \pm 23.3 \mu\text{g/g}$  d.w.. Our results demonstrate that the  
262 concentration of *n*-alcohols either increased or decreased gradually with increasing carbon  
263 chain-length with only one homologue being dominant (Fig. 1). Both tree birches, *B. pubescens*  
264 and *B. pendula*, revealed similar alcohol patterns and differed in absolute concentrations only.

265 In contrast to the tree birches, however, the two shrub birches showed a markedly different *n*-  
266 alcohol distribution and were well distinguishable.  
267 Diefendorf et al. (2011, 2015) reported that the average concentrations of *n*-alcohols in leaves  
268 of deciduous angiosperm trees from the U.S. commonly were twice as high as those of *n*-  
269 alkanes. In our study *B. nana* exclusively revealed about 10 times higher concentrations of *n*-  
270 alcohols compared to *n*-alkanes. The other three species produced two to four times lower  
271 amounts of *n*-alcohols than *n*-alkanes. Previous studies have shown that grasses are mainly  
272 characterized by *n*C<sub>26</sub>, *n*C<sub>28</sub> and *n*C<sub>32</sub> alcohols [67,70]. This corresponds closely to generally  
273 low amounts of these homologues in favour of the high proportions of the shorter alcohols *n*C<sub>20</sub>  
274 or *n*C<sub>22</sub> in *B. humilis*, *B. pubescens* and *B. pendula*. Only the leaves of *B. nana* produced a  
275 higher proportion of *n*C<sub>26</sub> and *n*C<sub>28</sub> alcohols.

276

### 277 ***n*-alkanoic acids of *Betula* epicuticular wax**

278 The *n*-alkanoic acid abundances were characterized by a strong even-over-odd dominance in  
279 carbon chain-lengths in the range of *n*C<sub>12</sub> to *n*C<sub>30</sub>. Similar to the *n*-alcohols, short-chain  
280 homologues (<*n*C<sub>20</sub>) were not significant for higher plants since these compounds are also  
281 produced by a variety of organisms like bacteria and algae, or derive from cellular membranes  
282 rather than waxes. Here, in all four birches species alkanolic acids in the range of *n*C<sub>12</sub> to *n*C<sub>30</sub>  
283 were observed to peak at *n*C<sub>16</sub> or *n*C<sub>28</sub>. In the range of the long-chain fatty acids (>*n*C<sub>20</sub>), the  
284 four *Betula* species maximized exclusively at *n*C<sub>28</sub>, whereby their concentrations differed by  
285 two orders of magnitude (Fig. 1). Thus, *B. nana* yielded only 1.75±2.2 µg/g d.w. of *n*C<sub>28</sub>, while  
286 *B. humilis* produced 201.2±13.4 µg/g d.w. of C<sub>28</sub>. *B. pubescens* and *B. pendula* showed  
287 intermediate concentrations of 34.3±2.4 and 34.7±4.0 µg/g d.w., respectively. *B. nana*  
288 produced more short chain alkanolic acids than long-chain homologues, with highest  
289 concentration at *n*C<sub>16</sub> with 44.3±6.1 µg/g d.w. and *n*C<sub>18</sub> with 20.8±1.3 µg/g d.w..

290 The relative distribution patterns of long-chain alkanolic acids in the four birches were too  
291 similar to allow for differentiation. These basic findings were consistent with a litter and topsoil  
292 transect experiment in which deciduous forest sites also showed a dominance of  $nC_{28}$  alkanolic  
293 acids and differed from conifer ( $nC_{24}$ ) and grasslands sites ( $nC_{32}$  and  $nC_{34}$ ) [71]. Therefore,  $C_{28}$   
294 alkanolic acid preponderance may serve to distinguish wax lipid inputs of birches from those  
295 of grasses and conifers, like pines. This may be applicable for sediments in periods such as the  
296 Late Glacial and Early Holocene in Central Europe, where successions were characterised by  
297 a minor diversity in plant species. In contrast, Diefendorf et al. (2011) observed that the  $n$ -  
298 alkanolic acid distributions across plant groups from the east coast of the USA, both  
299 angiosperms and gymnosperms, were similar with no dominant homologue present.

300

### 301 ***n*-alkyl esters of *Betula* epicuticular wax**

302 Wax esters are dimeric wax compounds build by a  $n$ -alcohol and a  $n$ -alkanoic acid moiety,  
303 whereby each  $n$ -alkyl ester isomer can be composed of several different combinations of  $n$ -  
304 alcohol and  $n$ -alkanoic acid homologues (S2) [72]. Saturated wax ester homologues were  
305 identified according to their characteristic molecular ions ( $M^+$ ) [73]. Straight-chain wax esters  
306 in the range of  $nC_{38}$  to  $nC_{48}$  were detected in all four species, which is typical for higher plants  
307 [74] (Fig. 1). Additionally, *B. humilis* produced minor quantities of the  $nC_{36}$  homologue. The  
308 alkyl ester composition of *B. nana* maximized at  $nC_{44}$  with  $104.2 \pm 33.4 \mu\text{g/g d.w.}$  with an almost  
309 normal distribution. *B. humilis* peaked at  $nC_{36}$  with  $1047.1 \pm 254.0 \mu\text{g/g d.w.}$ , followed by a  
310 linear decrease in concentration of longer-chain wax esters up to  $nC_{48}$ . Wax esters chain lengths  
311 of *B. pubescens* and *B. pendula* leaves ranged from  $nC_{38}$  to  $nC_{46}$ , whereby the concentrations  
312 decreased with an increase in chain-lengths. Concentrations of  $nC_{38}$  wax ester of *B. pubescens*  
313 and *B. pendula* yielded  $535.7 \pm 99.4$  and  $122.7 \pm 35.5 \mu\text{g/g d.w.}$ , respectively.

314

## 315 **Isomer distribution of wax esters and input to free *n*-alkanoic acids** 316 **and *n*-alcohol amount**

317 The mass spectral analysis of wax esters by GC/MS allowed to investigate their corresponding  
318 bound *n*-alcohol and *n*-alkanoic acids (Fig. 6, S3-S6 Tables).

319 In all four species, only even-chain alkanolic acids in the range of  $nC_{14}$  to  $nC_{28}$  and alcohol  
320 moieties ranging from  $nC_{18}$  to  $nC_{32}$  were observed resulting in even-chain alkyl esters. In *B.*  
321 *nana*,  $nC_{20}$  was the overall dominant ester-bound alkanolic acid moiety with 62.2  $\mu\text{g/g}$  d.w. and  
322  $nC_{24}$  the most prominent ester-bound alcohol with 58.9  $\mu\text{g/g}$  d.w.. In the shorter  $nC_{38}$  and  $nC_{40}$   
323 esters shorter ester-bound alkanolic acids with 14 and 16 carbon atoms as well as shorter ester-  
324 bound alcohols like  $nC_{22}$  occurred. The ester homologues of *B. humilis*, *B. pubescens* and *B.*  
325 *pendula* were dominated by short-chain  $nC_{16}$  bound alkanolic acid moieties (841.5, 368.8, 75.7  
326  $\mu\text{g/g}$  d.w.), while  $nC_{20}$  was the most dominant alkanolic acid homologue in the long-chain  
327 alkanolic acid fraction (190.6, 38.0, 33.4  $\mu\text{g/g}$  d.w.). However, compared to the short-chain  
328 alkanolic acids, the long-chain homologues were less abundant in concentrations up to factor of  
329 10. The major esterified alcohol within the three species varied significantly. *B. humilis* was  
330 dominated by  $nC_{20}$  (744.2  $\mu\text{g/g}$  d.w.), *B. pubescens* by  $nC_{22}$  (346.6  $\mu\text{g/g}$  d.w.) and *B. pendula*  
331 by  $nC_{24}$  (82.7  $\mu\text{g/g}$  d.w.) and  $nC_{22}$  (81.2  $\mu\text{g/g}$  d.w.) bound alcohols.

332 The bound *n*-alkanoic acid and *n*-alcohol moieties of wax esters might be released during  
333 hydrolysis upon incorporation of alkyl esters into soil or during early burial stages in sediments.  
334 As consequence, the amount of hydrolysis-released, previously ester-bound *n*-alkanoic acids  
335 and *n*-alcohols in a sediment will impact on the quantity and distribution pattern of free *n*-  
336 alkanolic acids and *n*-alcohols derived from leaf waxes [70] and needs to be considered in  
337 paleovegetation reconstruction. However, intact wax esters can survive in sediments and can  
338 be used for paleovegetation reconstruction [63,75,76] as well.

339 To test for the potential release of alcohols and acids from esters two different scenarios were  
340 calculated. In the first scenario, 50% of the esterified *n*-alkanoic acids and *n*-alcohols were  
341 released and added to their corresponding free homologues (Fig. 2). In the second scenario, the  
342 maximum release of 100% of the bound lipids and addition to the free analogues was used.  
343 Since the wax esters of all four birches consisted mainly of short-chain fatty acids, they do not  
344 significantly increase the pool of long-chain fatty acids ( $>nC_{20}$ ) typical for terrestrial higher  
345 plants. Solely in *B. nana*, the alkanolic acid distribution changed from a previously rather  
346 balanced distribution of  $nC_{20}$  to  $nC_{28}$  with 1 to 2  $\mu\text{g/g}$  d.w. to a dominance of  $nC_{20}$  with  $>60$   
347  $\mu\text{g/g}$  d.w., due to the release of the esterified homologues. A dominance of  $nC_{28}$  alkanolic acid  
348 was still observed for the other three birches when 50% of the esterified alkanolic acids had  
349 been released. Only upon 100% release of the bound long-chain fatty acids, a bimodal  
350 distribution maximizing at  $nC_{20}$  and  $nC_{28}$  could be noted for *B. pubescens*, which would  
351 complicate a source identification in sediments.

352 The bound *n*-alcohols of the alkyl esters in the four European birches ranged from  $nC_{20}$  to  $nC_{32}$ .  
353 Sometimes, the dominant esterified *n*-alcohol was found to be the same as the dominant free  
354 homologue in the same species (Fig. 3). For example, in *B. humilis*  $nC_{20}$  and in *B. pubescens*  
355  $nC_{22}$  were the dominant free and esterified *n*-alcohol, respectively. The release of 100 % bound  
356 *n*-alcohols of both species increased the total amount by about 25%. However, the relative  
357 distributions remained comparable. The previously identified dominance of the free  $nC_{22}$   
358 alcohol in *B. pendula* was reduced by the release of a high proportion of  $nC_{24}$ . In contrast, the  
359 distribution in *B. nana* changed from a dominance of  $nC_{28}$  to a bimodal distribution maximizing  
360 at  $nC_{24}$  and  $nC_{28}$  due to the addition of ester-bound *n*-alcohols. The dominance of free  $nC_{22}$   
361 alcohol in *B. pendula* was reduced by the release of the high proportion of  $nC_{24}$ .

362 Our model indicates that the decay of the *n*-alkyl ester can significantly affect the original free  
363 lipid composition of birch leaves, which in sediments may complicate an unambiguous  
364 assignment based on *n*-alcohol and *n*-alkanoic acids.

365

366 **Fig. 2: Distribution of esterified (bound) alkanolic acids in the alkyl esters and their**  
367 **corresponding free homologues in the same leaf.** The two lower rows depict the summed  
368 concentration of free fatty acids plus an additional 50% or 100 % bound fatty acids released by  
369 hydrolysis, respectively.

370

371

372 **Fig. 3: Distribution of esterified (bound) alcohols in the alkyl esters and their**  
373 **corresponding free homologues in the same leaf.** The two lower rows depict the summed  
374 concentration of free fatty acids plus an additional 50% or 100 % bound fatty acids released by  
375 hydrolysis, respectively.

376

377

## 378 **Wax lipids from *Betula* grown in Kiel compared with literature** 379 **data**

380 To consolidate the application of the lipid composition of the four European birches for  
381 paleovegetation reconstruction and chemotaxonomic differentiation, we compared our wax  
382 lipid data of birch trees grown in the Botanical Garden in Kiel with previously published data  
383 (Table 1). However, solely the *n*-alkane composition of *B. nana*, *B. pubescens* and *B. pendula*  
384 can be compared, as to the best of our knowledge, the other wax lipid classes were not  
385 examined in full in previous studies. To our best knowledge, there are no previous studies on  
386 the wax lipid composition of *B. humilis* leaves, thus we do not have any complementary data



387 for comparison. For a better comparison of published data, we have recalculated the  
388 distributions given in absolute concentrations into relative abundances, to exclude variation in  
389 absolute concentration due to different extraction techniques or analytical protocols. Different  
390 extraction techniques and analytic procedures used in the cited studies are briefly described  
391 here:

- 392 - Extraction of epicuticular waxes by immersion of the whole leaf into solvent mixture with or  
393 without ultrasonic bath, e.g. DCM:hexane (1:1) or pure DCM (our study, [77]) ;
- 394 - Prior to extraction, grinding or milling of leaves into a fine powder, followed by ASE  
395 (extraction under elevated temperature and pressure) or Soxhlet extraction [78–80]; here,  
396 intra-cuticular waxes potentially have been extracted;
- 397 - Hydrolysis (10% KOH in ethanol) of ground leaves to extract bound lipids [81]; esterified  
398 alkanolic acids and alcohols were released and increased the pool of their free homologues.

399 Most leaves from *B. nana* are characterized by a variable distribution of *n*-alkanes ranging  
400 from *n*C<sub>23</sub> to *n*C<sub>33</sub>. Samples from very northern latitudes such as Greenland, Alaska, Siberia  
401 and Norway had a high proportion of *n*C<sub>27</sub> to *n*C<sub>31</sub> homologues [80–82]. Conversely, *B. nana*  
402 leaves from Siberia and Norway can be distinguished from the other *B. nana* samples as these  
403 showed significant abundances of mid-chain *n*C<sub>23</sub> and *n*C<sub>25</sub> alkanes depressing relative  
404 amounts of C<sub>29</sub> and C<sub>31</sub> homologues [83,84]. Leaf *n*-alkanes of *B. pubescens* from Scotland  
405 were bimodally distributed with maxima at *n*C<sub>27</sub> and *n*C<sub>31</sub> [85]. In contrast, a unimodal  
406 distribution with a maximum at *n*C<sub>27</sub> was reported from Pagani et al. (2006), Ronkainen et al.  
407 (2015), and Balascio et al. (2018), with variable proportions of *n*C<sub>23</sub> and *n*C<sub>25</sub>, respectively. A  
408 dominance of C<sub>27</sub> alkane in leaves from *B. pubescens* has also been reported from Schwark et  
409 al. (2002) and Sachse et al. (2006). The latter author stated that only in birches (both *B.*  
410 *pubescens* and *B. pendula*) from northern Scandinavia *n*C<sub>27</sub> is the dominant homologue, while  
411 species from southern Scandinavia and Germany maximized at *n*C<sub>31</sub>. This shift in *n*-alkane

412 carbon chain-length was also expressed in an increasing ACL from North to South [87]. In  
413 contrast to this, Mayes et al. (1994) found a prevalence of C<sub>25</sub> in leaves from Norway.  
414 Similar to the leaves of *B. pubescens*, those of *B. pendula* contained high proportions of C<sub>25</sub>, if  
415 the distribution maximized at nC<sub>27</sub> and then constituted only minor long-chain homologues  
416 with more than 29 carbon atoms [78,79,88,89]. Two *B. pendula* species from Estonia and the  
417 UK, when grown under artificial laboratory conditions had a distinct bimodal distribution with  
418 maxima at C<sub>27</sub> and C<sub>31</sub> [77,90].  
419 Due to the complexity of the *n*-alkane patterns both within a species and between different  
420 species, we subdivided the data according to distributions of *n*-alkanes in each species into  
421 three groups to improve comparison. The published data of each species were subdivided into  
422 two groups (type I and type II) of similar composition and compared with the lipid distribution  
423 of the birches from Kiel (Fig. 4, Table 2). Type I of each species had a wax lipid composition  
424 similar to the *Betula* species from Kiel and was characterized by a dominance of long-chain *n*-  
425 alkanes (nC<sub>27</sub>, nC<sub>29</sub>, nC<sub>31</sub>). In contrast, type II of each species was defined by a high presence  
426 of mid-chain *n*-alkanes (nC<sub>23</sub>, nC<sub>25</sub>), but also nC<sub>27</sub>, and only minor quantities of long-chain *n*-  
427 alkanes with more than 29 carbon atoms.  
428 All *Betula* tree species from Kiel and from globally distributed type I were distinct from grasses  
429 and shrubs by a prominent prevalence of the nC<sub>27</sub> alkane (Fig. 1 and 4). Grasses are mainly  
430 dominated by very long-chain *n*-alkanes with nC<sub>31</sub> and nC<sub>33</sub> or even nC<sub>35</sub>, and therefore are  
431 characterized by a high ACL (>30) [44,49,67]. Typical pioneer shrubs of the late glacial period  
432 such as *Artemisia sp.* or *Junipers sp.* are also characterized by a dominance at nC<sub>31</sub> to nC<sub>35</sub>,  
433 which is not prevalent in *Betula* species [45,91,92]. Other prominent species such as *Pinus sp.*,  
434 which are probably the most widely spread conifer species in Europe, synthesize *n*-alkanes in  
435 the range from nC<sub>27</sub> and nC<sub>31</sub> [45,93]. However, the quantitative amounts are significantly

436 lower, pointing to subordinate proportions of sedimentary *n*-alkanes originating from pines  
437 [47].

438 The type II birch species had *n*-alkane distributions similar to aquatic macrophytes and non-  
439 emergent (submerged and floating) aquatic plants, with a prevalence of mid-chain *n*-alkanes  
440 ( $nC_{23}$ ,  $nC_{25}$ ). These homologues can be a major source to geological archives, especially in  
441 lake sediments, often expressed in the  $P_{aq}$  proxy [54,94]. It has been postulated that terrestrial  
442 plants correspond to  $P_{aq} < 0.1$ , emergent macrophytes to  $P_{aq} 0.1 - 0.4$  and non-emergent  
443 macrophytes to  $P_{aq} 0.4 - 1.0$  to [54]. Each type II birch species, as well as *B. humilis* from our  
444 study, had a  $P_{aq}$  value above 0.75 corresponding to a non-emergent macrophyte. Therefore,  
445 when applying the  $P_{aq}$  proxy in the study of lake sediments receiving birch input, it must be  
446 considered that mid-chain *n*-alkanes may derive from either aquatic macrophytes or  
447 alternatively from birch trees.

448 *n*-Alkane abundance or chain-length based indicators like ACL have been used as a proxy for  
449 temperature, aridity, geographic location, or vapour pressure deficit [95–98]. The variation of  
450 the ACL compiled for *B. nana* did not show a trend with climatic drivers. The *B. nana* trees  
451 listed, mostly derived from cold environments such as Alaska, Greenland or Siberia and varied  
452 in their ACL between 26.4 and 28.9 [80,82,83]. Even two samples both originating from  
453 Norway varied by over 2 units in their ACL [81,84]. The *B. nana* investigated from Kiel, and  
454 therefore from the warmest region, did not reveal the highest ACL, but rather values between  
455 those of leaves from Greenland and Alaska. The ACL distributions of *B. pubescens* revealed  
456 higher values in samples from a moderate climate (Kiel, Scotland), whereas samples from  
457 colder regions (Siberia, Norway) had a lower ACL. Under certain assumptions, this can be  
458 attributed a geographical or temperature effect. The origin for the *B. pubescens* leaves from the  
459 study by Pagani et al. (2006) were not reported. Similar to *B. nana*, no latitudinal or temperature  
460 trend in the *n*-alkane distribution of *B. pendula* wax was observed.

461 Overall, a high variability of wax *n*-alkanes within the individual species was noted without a  
462 temperature or geographical trend. This may suggest that genetic differences between the  
463 populations control wax lipid composition, preferentially. It is conceivable that not only "pure-  
464 bred" birches of the respective species were examined in these studies, but also subspecies or  
465 varieties. For example, *Betula pubescens* has several varieties that occur naturally in a narrow  
466 space like *var. pubescens*, *var. fragrans*, *var. litwinowii* and *var. pumila* [15]. Wild  
467 hybridization may also affect leaf wax composition, whereby hybridization readily occurs  
468 between species with the same chromosome number like *B. pendula* x *B. nana* (diploid x  
469 diploid), but there are also reports of interploidy-level hybrids like *pendula* x *B. pubescens*  
470 (diploid x tetraploid) [99,100]. Therefore, future studies may address the association between  
471 ploidy level and wax lipid composition of *Betula* species to investigate species determination.

472

473 **Figure 4: Relative abundances of *n*-alkane patterns for *Betula nana*, *Betula humilis*, *Betula***  
474 ***pubescens* and *Betula pendula*.** The samples from our study (Kiel) were compared with literature data  
475 previously divided into two subgroups (Type I and Type II; see text for details) with similar  
476 compositions. Note, to the best of our knowledge there are no previous studies reporting the epicuticular  
477 wax composition of *Betula humilis*.

478

479

480

481

482

483

484

485 **Table 1: Relative *n*-alkane abundances of all *Betula* species**

486

487

| Species             | Article                   | Location         | Typ  | Relative abundance % |    |    |    |    |    |    |    |    |    |    |    |    |   |       |  |  | ACL |
|---------------------|---------------------------|------------------|------|----------------------|----|----|----|----|----|----|----|----|----|----|----|----|---|-------|--|--|-----|
|                     |                           |                  |      | 23                   | 24 | 25 | 26 | 27 | 28 | 29 | 30 | 31 | 32 | 33 | 34 | 35 |   |       |  |  |     |
| <i>B. nana</i>      | Weber & Schwark (2019)    | Kiel             | Kiel | 0                    | 0  | 9  | 3  | 37 | 3  | 14 | 2  | 32 | 0  | 0  | 0  | 0  | 0 | 28.49 |  |  |     |
| <i>B. nana</i>      | Berke et al. (2019)       | Greenland        | I    | 9                    | 7  | 14 | 10 | 17 | 1  | 15 | 1  | 24 | 1  | 2  | 0  | 0  | 0 | 27.95 |  |  |     |
| <i>B. nana</i>      | Daniels et al. (2017)     | Alaska (USA)     | I    | 1                    | 4  | 5  | 9  | 24 | 3  | 17 | 3  | 26 | 3  | 5  | 0  | 0  | 0 | 28.94 |  |  |     |
| <i>B. nana</i>      | Mayes et al. (1994)       | Norway           | I    | 12                   | 4  | 10 | 7  | 20 | 0  | 19 | 1  | 23 | 0  | 2  | 0  | 0  | 0 | 27.88 |  |  |     |
| <i>B. nana</i>      | Ronkainen et al. (2015)   | Siberia (Russia) | II   | 20                   | 1  | 22 | 1  | 34 | 1  | 7  | 1  | 12 | 0  | 1  | 0  | 0  | 0 | 26.45 |  |  |     |
| <i>B. nana</i>      | Balascio et al. (2018)    | Norway           | II   | 30                   | 0  | 27 | 0  | 30 | 0  | 5  | 0  | 6  | 0  | 1  | 0  | 0  | 0 | 25.65 |  |  |     |
| <i>B. humilis</i>   | Weber & Schwark (2019)    | Kiel             | Kiel | 0                    | 0  | 23 | 0  | 72 | 0  | 5  | 0  | 0  | 0  | 0  | 0  | 0  | 0 | 26.65 |  |  |     |
| <i>B. pubescens</i> | Weber & Schwark (2019)    | Kiel             | Kiel | 0                    | 0  | 11 | 1  | 15 | 0  | 11 | 1  | 49 | 1  | 12 | 0  | 0  | 0 | 29.72 |  |  |     |
| <i>B. pubescens</i> | Rao et al. (2003)         | Scotland (UK)    | I    | 1                    | 1  | 16 | 3  | 25 | 1  | 16 | 0  | 31 | 2  | 4  | 0  | 0  | 0 | 28.53 |  |  |     |
| <i>B. pubescens</i> | Ronkainen et al. (2015)   | Siberia (Russia) | II   | 19                   | 1  | 25 | 2  | 42 | 1  | 5  | 0  | 4  | 0  | 0  | 0  | 0  | 0 | 26.00 |  |  |     |
| <i>B. pubescens</i> | Pagani et al. (2006)      | ?                | II   | 5                    | 0  | 23 | 0  | 73 |    |    |    |    |    |    |    |    |   | 26.36 |  |  |     |
| <i>B. pubescens</i> | Mayes et al. (1994)       | Norway           | II   | 35                   | 0  | 48 | 0  | 4  | 0  | 9  | 0  | 3  | 0  | 0  | 0  | 0  | 0 | 24.94 |  |  |     |
| <i>B. pubescens</i> | Balascio et al. (2018)    | Norway           | II   | 25                   | 0  | 27 | 0  | 43 | 0  | 3  | 0  | 1  | 0  | 0  | 0  | 0  | 0 | 25.53 |  |  |     |
| <i>B. pendula</i>   | Weber & Schwark (2019)    | Kiel             | Kiel | 2                    | 0  | 24 | 1  | 29 | 0  | 7  | 0  | 32 | 0  | 3  | 0  | 0  | 0 | 28.07 |  |  |     |
| <i>B. pendula</i>   | Huang et al. (1999)       | Solar Dome (UK)  | I    | 0                    | 0  | 20 | 0  | 25 | 0  | 12 | 0  | 37 | 0  | 7  | 0  | 0  | 0 | 28.72 |  |  |     |
| <i>B. pendula</i>   | Lihavainen et al. (2017)  | Estonia          | I    | 2                    | 1  | 12 | 2  | 18 | 4  | 7  | 4  | 19 | 6  | 14 | 3  | 8  | 0 | 29.60 |  |  |     |
| <i>B. pendula</i>   | Zech et al. (2010)        | Russia           | II   | 0                    | 0  | 30 | 2  | 50 | 1  | 5  | 1  | 10 | 1  | 1  | 0  | 0  | 0 | 26.96 |  |  |     |
| <i>B. pendula</i>   | Dawson et al. (2004)      | UK               | II   | 6                    | 0  | 34 | 0  | 38 | 0  | 6  | 0  | 12 | 0  | 3  | 0  | 0  | 0 | 26.88 |  |  |     |
| <i>B. pendula</i>   | Tarasov et al. (2013)     | Siberia (Russia) | II   | 0                    | 0  | 45 | 3  | 49 | 1  | 2  | 0  | 0  | 0  | 0  | 0  | 0  | 0 | 26.09 |  |  |     |
| <i>B. pendula</i>   | van den Bos et al. (2018) | Netherlands      | II   | 11                   | 0  | 31 | 0  | 40 | 0  | 6  | 0  | 11 | 0  | 1  | 0  | 0  | 0 | 26.56 |  |  |     |

Table 2:

| Species             | Typ  | Relative abundance (%) |    |    |    |    |    |    |    |    |    |    |    |    | ACL   |
|---------------------|------|------------------------|----|----|----|----|----|----|----|----|----|----|----|----|-------|
|                     |      | 23                     | 24 | 25 | 26 | 27 | 28 | 29 | 30 | 31 | 32 | 33 | 34 | 35 |       |
| <i>B. nana</i>      | Kiel | 0                      | 0  | 9  | 3  | 37 | 3  | 14 | 2  | 32 | 0  | 0  | 0  | 0  | 28.49 |
| <i>B. nana</i>      | I    | 7                      | 5  | 10 | 9  | 20 | 1  | 17 | 2  | 24 | 1  | 3  | 0  | 0  | 28.24 |
| <i>B. nana</i>      | II   | 25                     | 1  | 25 | 1  | 32 | 1  | 6  | 0  | 9  | 0  | 1  | 0  | 0  | 26.04 |
| <i>B. humilis</i>   | Kiel | 0                      | 0  | 23 | 0  | 72 | 0  | 5  | 0  | 0  | 0  | 0  | 0  | 0  | 26.65 |
| <i>B. pubescens</i> | Kiel | 0                      | 0  | 11 | 1  | 15 | 0  | 11 | 1  | 49 | 1  | 12 | 0  | 0  | 29.72 |
| <i>B. pubescens</i> | I    | 1                      | 1  | 16 | 3  | 25 | 1  | 16 | 0  | 31 | 2  | 4  | 0  | 0  | 28.53 |
| <i>B. pubescens</i> | II   | 21                     | 0  | 31 | 0  | 40 | 0  | 6  | 0  | 3  | 0  | 0  | 0  | 0  | 25.79 |
| <i>B. pendula</i>   | Kiel | 2                      | 0  | 24 | 1  | 29 | 0  | 7  | 0  | 32 | 0  | 3  | 0  | 0  | 28.07 |
| <i>B. pendula</i>   | I    | 1                      | 1  | 16 | 1  | 21 | 2  | 10 | 2  | 28 | 3  | 10 | 2  | 4  | 29.11 |
| <i>B. pendula</i>   | II   | 4                      | 0  | 35 | 1  | 44 | 1  | 5  | 0  | 8  | 0  | 1  | 0  | 0  | 26.62 |

492

493

#### 494 **Analytical and extraction protocols used in previous *Betula* studies**

495 Different analytic protocols have been used to extract the plant lipids as briefly described  
 496 above. Previous studies have shown that the length of the extraction time, as well as the solvent  
 497 used, had an influence on extraction yield or lipid extract composition [37,46]. Thus, *n*-alkanes  
 498 and *n*-alcohols were extracted earlier than *n*-alkanoic acids and long-chain homologues earlier  
 499 than the shorter ones [101]. Jetter et al. (2008) indicated extraction yields of *n*-alkanes  
 500 depended on polarity of binary solvent mixtures. Moreover, saponification upon extraction  
 501 [81], hydrolyzed wax esters leading to enhanced release of bound *n*-alcohols and *n*-alkanoic  
 502 acids adding to the proportion of the free homologues. Since this comparative investigation  
 503 used *n*-alkane distributions from different studies with different extraction methods, the results  
 504 are not unequivocally comparable. For a better comparability of future work, the influence of  
 505 the extraction method on the other lipid classes including *n*-alcohols, *n*-alkanoic acids and *n*-  
 506 alkyl esters should be investigated and a standard extraction protocol established.

507

## 508 Conclusion

509 The leaves of four *Betula* species, *B. nana*, *B. humilis*, *B. pubescens*, *B. pendula*, which are  
510 endemic in Europe were studied, aiming to investigate their epicuticular wax lipid composition.

511 The following conclusions can be drawn from this study. The *n*-alkane compositions in leaves  
512 of *Betula* species from Kiel were found to be specific, allowing unambiguous differentiation.

513 *Betula* wax *n*-alcohol and *n*-alkyl ester composition allowed a distinction to be made between  
514 *B. nana*, *B. humilis* and the two birch trees, however the latter two cannot be easily  
515 distinguished from each other due to a similar fingerprint. The *n*-alkanoic acids seemed to be  
516 less suitable for species differentiation since all four species were dominated by the C<sub>28</sub>  
517 alkanolic acid, however with variations in concentration of about two orders of magnitude. A  
518 flowchart (Fig. 5) provides a simple means for discrimination of epicuticular waxes from the  
519 four birches from Kiel University.

520 The *n*-alkyl esters consisted of different isomers with varying *n*-alcohol and *n*-alkanoic acid  
521 moieties. In the species *B. humilis* and *B. pubescens*, the dominant esterified alcohol also was  
522 the dominant free alcohol, therefore the *n*-alcohol patterns in sediments would not be disturbed  
523 by hydrolysis of the wax esters. In *B. nana* and *B. pendula* the *n*-alcohol distribution changed  
524 substantially upon ester hydrolysis, when bound homologues were released. Due to the  
525 preponderance of short-chain ester-bound alkanolic acids in wax esters, the distribution of free  
526 long-chain alkanolic acids was only slightly impaired. The ratio was influenced in *B. nana* only,  
527 as large amounts of bound C<sub>20</sub> were released.

528 When comparing the *n*-alkane composition of the *Betula* waxes collected in Kiel with  
529 published data, no trend in geographical location or temperature could be identified. It appears  
530 that *Betula* wax composition is genetically controlled, and differences occur due to presence of  
531 plant hybrids or variants.

532

533 **Figure 5: Decision making tree for differentiation of four European *Betula* species based**  
534 **on epicuticular wax composition**

535

536

## 537 **Acknowledgements**

538 T. Martens and V. Grote are thanked for laboratory assistance during lipid extraction. S.  
539 Petersen is thanked for her advice during leaf sampling in the Botanical Garden of Kiel  
540 University.

541

542

543

544

545

546

547

548

549

550

551



## 552 **References**

- 553 1. Crane PR, Stockey RA. *Betula* leaves and reproductive structures from the Middle Eocene of  
554 British Columbia, Canada. *Can J Bot*. 1987;65: 2490–2500. doi:10.1139/b87-338
- 555 2. Järvinen P, Palme A, Orlando Morales L, Lannenpaa M, Keinanen M, Sopanen T, et al.  
556 Phylogenetic relationships of *Betula* species (Betulaceae) based on nuclear ADH and  
557 chloroplast matK sequences. *Am J Bot*. 2004;91: 1834–1845. doi:10.3732/ajb.91.11.1834
- 558 3. Schenk MF, Thienpont C-N, Koopman WJM, Gilissen LJWJ, Smulders MJM. Phylogenetic  
559 relationships in *Betula* (Betulaceae) based on AFLP markers. *Tree Genet Genomes*. 2008;4:  
560 911. doi:10.1007/s11295-008-0162-0
- 561 4. Bina H, Yousefzadeh H, Ali SS, Esmailpour M. Phylogenetic relationships, molecular  
562 taxonomy, biogeography of *Betula*, with emphasis on phylogenetic position of Iranian  
563 populations. *Tree Genet Genomes*. 2016;12: 84. doi:10.1007/s11295-016-1037-4
- 564 5. Julkunen-Tiitto R, Rousi M, Bryant J, Sorsa S, Keinänen M, Sikanen H. Chemical diversity of  
565 several Betulaceae species: comparison of phenolics and terpenoids in northern birch stems.  
566 *Trees*. 1996;11: 16. doi:10.1007/s004680050053
- 567 6. Keinänen M, Julkunen-Tiitto R, Rousi M, Tahvanainen J. Taxonomic implications of phenolic  
568 variation in leaves of birch (*Betula* L.) species. *Biochem Syst Ecol*. 1999;27: 243–254.  
569 doi:10.1016/S0305-1978(98)00086-6
- 570 7. Orav A, Arak E, Boikova T, Raal A. Essential oil in *Betula* spp. leaves naturally growing in  
571 Estonia. *Biochem Syst Ecol*. 2011;39: 744–748. doi:10.1016/j.bse.2011.06.013
- 572 8. Depciuch J, Kasprzyk I, Drzymała E, Parlinska-Wojtan M. Identification of birch pollen  
573 species using FTIR spectroscopy. *Aerobiologia (Bologna)*. 2018;34: 525–538.  
574 doi:10.1007/s10453-018-9528-4
- 575 9. Furlow JJ. The genera of Betulaceae in the southeastern United States. *J Arnold Arboretum*.  
576 1990;71: 1–67. doi:10.5962/bhl.part.24925
- 577 10. Maliouchenko O, Palmé AE, Buonamici A, Vendramin GG, Lascoux M. Comparative  
578 phylogeography and population structure of European *Betula* species, with particular focus on

- 579 B. pendula and B. pubescens. J Biogeogr. 2007;34: 1601–1610. doi:10.1111/j.1365-  
580 2699.2007.01729.x
- 581 11. Wang N, McAllister HA, Bartlett PR, Buggs RJA. Molecular phylogeny and genome size  
582 evolution of the genus *Betula* (Betulaceae). Ann Bot. 2016;117: 1023–1035.  
583 doi:10.1093/aob/mcw048
- 584 12. Winkler H. Betulaceae Das Pflanzenreich. 39th ed. Engler A, editor. 1904.
- 585 13. De Jong PC. An introduction to *Betula*: Its morphology, evolution, classification and  
586 distribution with a survey of recent work. IDS *Betula* Symp Int Dendrol Soc Susses, UK.  
587 1993.
- 588 14. Skvortsov AK. A new system of the genus *Betula* L. Bull Mosc Natur Soc. 2002;107: 73–76.
- 589 15. Ashburner K, McAllister HA. The Genus *Betula*: A Taxonomic Revision of Birches. 2013.
- 590 16. Freund H, Birks HH, Birks HJB. The identification of wingless *Betula* fruits in Weichselian  
591 sediments in the Gross Todtshorn borehole (Lower Saxony, Germany) – the occurrence of  
592 *Betula humilis* Schrank. Veg Hist Archaeobot. 2001;10: 107–115. doi:10.1007/PL00006919
- 593 17. van Dinter M, Birks HH. Distinguishing fossil *Betula nana* and *B. pubescens* using their  
594 wingless fruits: implications for the late-glacial vegetational history of western Norway. Veg  
595 Hist Archaeobot. 1996;5: 229–240. doi:10.1007/BF00217500
- 596 18. Tsuda Y, Semerikov V, Sebastiani F, Vendramin GG, Lascoux M. Multispecies genetic  
597 structure and hybridization in the *Betula* genus across Eurasia. Mol Ecol. 2017;26: 589–605.  
598 doi:10.1111/mec.13885
- 599 19. Thomson AM, Dick CW, Pascoini AL, Dayanandan S. Despite introgressive hybridization,  
600 North American birches (*Betula* spp.) maintain strong differentiation at nuclear microsatellite  
601 loci. Tree Genet Genomes. 2015;11: 101. doi:10.1007/s11295-015-0922-6
- 602 20. Thórsson AT, Salmela E, Anamthawat-Jónsson K. Morphological, cytogenetic, and molecular  
603 evidence for introgressive hybridization in birch. J Hered. 2001;92: 404–8.  
604 doi:10.1093/jhered/92.5.404
- 605 21. Tralau H. The recent and fossil distribution of some boreal and arctic montane plants in  
606 Europe. Ark. Bot. Ser. 2; 1963.

- 607 22. Krüger S, Damrath M. In search of the Bølling-Oscillation: a new high resolution pollen  
608 record from the locus classicus Lake Bølling, Denmark. *Veg Hist Archaeobot.* 2019;  
609 doi:10.1007/s00334-019-00736-3
- 610 23. Eusterhues K, Lechterbeck J, Schneider J, Wolf-Brozio U. Late- and Post-Glacial evolution of  
611 Lake Steisslingen. *Palaeogeogr Palaeoclimatol Palaeoecol.* 2002;187: 341–371.  
612 doi:10.1016/S0031-0182(02)00486-8
- 613 24. Lotter AF. Late-glacial and Holocene vegetation history and dynamics as shown by pollen and  
614 plant macrofossil analyses in annually laminated sediments from Soppensee, central  
615 Switzerland. *Veg Hist Archaeobot.* 1999;8: 165–184. doi:10.1007/BF02342718
- 616 25. Lotter AF, Eicher U, Siegenthaler U, Birks HJB. Late-glacial climatic oscillations as recorded  
617 in Swiss lake sediments. *J Quat Sci.* 1992;7: 187–204. doi:10.1002/jqs.3390070302
- 618 26. Veski S, Amon L, Heinsalu A, Reitalu T, Saarse L, Stivrins N, et al. Lateglacial vegetation  
619 dynamics in the eastern Baltic region between 14,500 and 11,400calyrBP: A complete record  
620 since the Bølling (GI-1e) to the Holocene. *Quat Sci Rev.* 2012;40: 39–53.  
621 doi:10.1016/j.quascirev.2012.02.013
- 622 27. Tarasov PE, Bezrukova E V., Krivonogov SK. Late Glacial and Holocene changes in  
623 vegetation cover and climate in southern Siberia derived from a 15 kyr long pollen record from  
624 Lake Kotokel. *Clim Past.* 2009;5: 285–295. doi:10.5194/cp-5-285-2009
- 625 28. Mortensen MF, Birks HH, Christensen C, Holm J, Noe-Nygaard N, Odgaard BV, et al.  
626 Lateglacial vegetation development in Denmark – New evidence based on macrofossils and  
627 pollen from Slotseng, a small-scale site in southern Jutland. *Quat Sci Rev.* 2011;30: 2534–  
628 2550. doi:10.1016/j.quascirev.2011.04.018
- 629 29. Rösch M, Lechterbeck J. Seven Millennia of human impact as reflected in a high resolution  
630 pollen profile from the profundal sediments of Litzelsee, Lake Constance region, Germany.  
631 *Veg Hist Archaeobot.* 2016;25: 339–358. doi:10.1007/s00334-015-0552-9
- 632 30. Jahns S. Late-glacial and Holocene woodland dynamics and land-use history of the Lower  
633 Oder valley, north-eastern Germany, based on two, AMS14C-dated, pollen profiles. *Veg Hist*  
634 *Archaeobot.* 2000;9: 111–123. doi:10.1007/BF01300061

- 635 31. Birks HJB. The Identification of *Betula nana* Pollen. *New Phytol.* 1968;67: 309–314.  
636 doi:10.1111/j.1469-8137.1968.tb06386.x
- 637 32. Mäkelä EM. Size distinctions between *Betula* pollen types — A review. *Grana.* 1996;35: 248–  
638 256. doi:10.1080/00173139609430011
- 639 33. Caseldine C. Changes in *Betula* in the Holocene record from Iceland—a palaeoclimatic record  
640 or evidence for early Holocene hybridisation? *Rev Palaeobot Palynol.* 2001;117: 139–152.  
641 doi:10.1016/S0034-6667(01)00082-3
- 642 34. Karlsdóttir L, Thórsson ÆT, Hallsdóttir M, Sigurgeirsson A, Eysteinnsson T, Anamthawat-  
643 Jónsson K. Differentiating pollen of *Betula* species from Iceland. *Grana.* 2007;46: 78–84.  
644 doi:10.1080/00173130701237832
- 645 35. de Klerk P, Theuerkauf M, Joosten H. Vegetation, recent pollen deposition, and distribution of  
646 some non-pollen palynomorphs in a degrading ice-wedge polygon mire complex near  
647 Pokhodsk (NE Siberia), including size-frequency analyses of pollen attributable to *Betula*. *Rev*  
648 *Palaeobot Palynol.* 2017;238: 122–143. doi:10.1016/j.revpalbo.2016.11.015
- 649 36. Jenks MA, Joly RJ, Peters PJ, Rich PJ, Axtell JD, Ashworth EN. Chemically Induced Cuticle  
650 Mutation Affecting Epidermal Conductance to Water Vapor and Disease Susceptibility in  
651 *Sorghum bicolor* (L.) Moench. *Plant Physiol.* 1994;105: 1239–1245.  
652 doi:10.1104/pp.105.4.1239
- 653 37. Jetter R, Kunst L. Plant surface lipid biosynthetic pathways and their utility for metabolic  
654 engineering of waxes and hydrocarbon biofuels. *Plant J.* 2008;54: 670–683.  
655 doi:10.1111/j.1365-313X.2008.03467.x
- 656 38. Sieber P, Schorderet M, Ryser U, Buchala A, Kolattukudy P, Métraux J-P, et al. Transgenic  
657 *Arabidopsis* Plants Expressing a Fungal Cutinase Show Alterations in the Structure and  
658 Properties of the Cuticle and Postgenital Organ Fusions. *Plant Cell.* 2000;12: 721–737.  
659 doi:10.1105/tpc.12.5.721
- 660 39. Long LM, Patel HP, Cory WC, Stapleton AE. The maize epicuticular wax layer provides UV  
661 protection. *Funct Plant Biol.* 2003;30: 75. doi:10.1071/FP02159
- 662 40. Eglinton G, Hamilton RJ. Leaf Epicuticular Waxes. *Science* (80- ). 1967;156: 1322–1335.

- 663 doi:10.1126/science.156.3780.1322
- 664 41. Eglinton G, Gonzalez AG, Hamilton RJ, Raphael RA. Hydrocarbon constituents of the wax  
665 coatings of plant leaves: A taxonomic survey. *Phytochemistry*. 1962;1: 89–102.  
666 doi:10.1016/S0031-9422(00)88006-1
- 667 42. Herbin GA, Robins PA. Patterns of variation and development in leaf wax alkanes.  
668 *Phytochemistry*. 1969;8: 1985–1998. doi:10.1016/S0031-9422(00)88085-1
- 669 43. Gülz P-G. Epicuticular Leaf Waxes in the Evolution of the Plant Kingdom. *J Plant Physiol*.  
670 1994;143: 453–464. doi:10.1016/S0176-1617(11)81807-9
- 671 44. Maffei M. Chemotaxonomic significance of leaf wax alkanes in the gramineae. *Biochem Syst*  
672 *Ecol*. 1996;24: 53–64. doi:10.1016/0305-1978(95)00102-6
- 673 45. Schwark L, Zink K, Lechterbeck J. Reconstruction of postglacial to early Holocene vegetation  
674 history in terrestrial Central Europe via cuticular lipid biomarkers and pollen records from lake  
675 sediments. *Geology*. 2002;30: 463. doi:10.1130/0091-  
676 7613(2002)030<0463:ROPTEH>2.0.CO;2
- 677 46. Buschhaus C, Herz H, Jetter R. Chemical Composition of the Epicuticular and Intracuticular  
678 Wax Layers on Adaxial Sides of *Rosa canina* Leaves. *Ann Bot*. 2007;100: 1557–1564.  
679 doi:10.1093/aob/mcm255
- 680 47. Diefendorf AF, Freeman KH, Wing SL, Graham H V. Production of n-alkyl lipids in living  
681 plants and implications for the geologic past. *Geochim Cosmochim Acta*. 2011;75: 7472–  
682 7485. doi:10.1016/j.gca.2011.09.028
- 683 48. Diefendorf AF, Leslie AB, Wing SL. Leaf wax composition and carbon isotopes vary among  
684 major conifer groups. *Geochim Cosmochim Acta*. 2015;170: 145–156.  
685 doi:10.1016/j.gca.2015.08.018
- 686 49. Bush RT, McInerney FA. Leaf wax n-alkane distributions in and across modern plants:  
687 Implications for paleoecology and chemotaxonomy. *Geochim Cosmochim Acta*. 2013;117:  
688 161–179. doi:10.1016/j.gca.2013.04.016
- 689 50. Mueller-Niggemann C, Schwark L. Chemotaxonomy and diagenesis of aliphatic hydrocarbons  
690 in rice plants and soils from land reclamation areas in the Zhejiang Province, China. *Org*

- 691 Geochem. 2015;83–84: 215–226. doi:10.1016/j.orggeochem.2015.03.016
- 692 51. Guo Y, Li JJ, Busta L, Jetter R. Coverage and composition of cuticular waxes on the fronds of  
693 the temperate ferns *Pteridium aquilinum*, *Cryptogramma crispa*, *Polypodium glycyrrhiza*,  
694 *Polystichum munitum* and *Gymnocarpium dryopteris*. *Ann Bot.* 2018;122: 555–568.  
695 doi:10.1093/aob/mcy078
- 696 52. Blumer M, Guillard RRL, Chase T. Hydrocarbons of marine phytoplankton. *Mar Biol.* 1971;8:  
697 183–189. doi:10.1007/BF00355214
- 698 53. Cranwell PA, Eglinton G, Robinson N. Lipids of aquatic organisms as potential contributors to  
699 lacustrine sediments-II. *Org Geochem.* 1987;11: 513–527. doi:10.1016/0146-6380(87)90007-6
- 700 54. Ficken K., Li B, Swain D., Eglinton G. An n-alkane proxy for the sedimentary input of  
701 submerged/floating freshwater aquatic macrophytes. *Org Geochem.* 2000;31: 745–749.  
702 doi:10.1016/S0146-6380(00)00081-4
- 703 55. Pancost RD, Baas M, van Geel B, Sinninghe Damsté JS. Biomarkers as proxies for plant  
704 inputs to peats: an example from a sub-boreal ombrotrophic bog. *Org Geochem.* 2002;33:  
705 675–690. doi:10.1016/S0146-6380(02)00048-7
- 706 56. Shepherd T, Robertson GW, Griffiths DW, Birch ANE. Epicuticular wax ester and  
707 triacylglycerol composition in relation to aphid infestation and resistance in red raspberry  
708 (*Rubus idaeus* L.). *Phytochemistry.* 1999;52: 1255–1267. doi:10.1016/S0031-9422(99)00414-  
709 8
- 710 57. Schouten S, Woltering M, Rijpstra WIC, Sluijs A, Brinkhuis H, Sinninghe Damsté JS. The  
711 Paleocene-Eocene carbon isotope excursion in higher plant organic matter: Differential  
712 fractionation of angiosperms and conifers in the Arctic. *Earth Planet Sci Lett.* 2007;258: 581–  
713 592. doi:10.1016/j.epsl.2007.04.024
- 714 58. Smith F, Wing S, Freeman K. Magnitude of the carbon isotope excursion at the Paleocene–  
715 Eocene thermal maximum: The role of plant community change. *Earth Planet Sci Lett.*  
716 2007;262: 50–65. doi:10.1016/j.epsl.2007.07.021
- 717 59. Schellekens J, Buurman P. Geoderma n -Alkane distributions as palaeoclimatic proxies in  
718 ombrotrophic peat : The role of decomposition and dominant vegetation. *Geoderma.* 2011;164:

- 719 112–121. doi:10.1016/j.geoderma.2011.05.012
- 720 60. Jansen B, Wiesenberg GLB. Opportunities and limitations related to the application of plant-  
721 derived lipid molecular proxies in soil science. *SOIL*. 2017;3: 211–234. doi:10.5194/soil-3-  
722 211-2017
- 723 61. Jansen B, de Boer EJ, Cleef AM, Hooghiemstra H, Moscol-Olivera M, Tonneijck FH, et al.  
724 Reconstruction of late Holocene forest dynamics in northern Ecuador from biomarkers and  
725 pollen in soil cores. *Palaeogeogr Palaeoclimatol Palaeoecol*. 2013;386: 607–619.  
726 doi:10.1016/j.palaeo.2013.06.027
- 727 62. Wiesenberg GLB, Andreeva DB, Chimitdorgieva GD, Erbajeva MA, Zech W. Reconstruction  
728 of environmental changes during the late glacial and Holocene reflected in a soil-sedimentary  
729 sequence from the lower Selenga River valley, Lake Baikal region, Siberia, assessed by lipid  
730 molecular proxies. *Quat Int*. 2015;365: 190–202. doi:10.1016/j.quaint.2015.01.042
- 731 63. Lockheart MJ, van Bergen PF, Evershed RP. Chemotaxonomic classification of fossil leaves  
732 from the Miocene Clarkia lake deposit, Idaho, USA based on n -alkyl lipid distributions and  
733 principal component analyses. *Org Geochem*. 2000;31: 1223–1246. doi:10.1016/S0146-  
734 6380(00)00107-8
- 735 64. Huang Y, Lockheart MJ, Collister JW, Eglinton G. Molecular and isotopic biogeochemistry of  
736 the Miocene Clarkia Formation: hydrocarbons and alcohols. *Org Geochem*. 1995;23: 785–801.  
737 doi:10.1016/0146-6380(95)80001-8
- 738 65. Poynter J, Eglinton G. Molecular Composition of Three Sediments from Hole 717C: The  
739 Bengal Fan. *Proceedings of the Ocean Drilling Program, 116 Scientific Results*. Ocean  
740 Drilling Program; 1990. pp. 155–161. doi:10.2973/odp.proc.sr.116.151.1990
- 741 66. Castañeda IS, Werne JP, Johnson TC, Filley TR. Late Quaternary vegetation history of  
742 southeast Africa: The molecular isotopic record from Lake Malawi. *Palaeogeogr*  
743 *Palaeoclimatol Palaeoecol*. 2009;275: 100–112. doi:10.1016/j.palaeo.2009.02.008
- 744 67. Rommerskirchen F, Plader A, Eglinton G, Chikaraishi Y, Rullkötter J. Chemotaxonomic  
745 significance of distribution and stable carbon isotopic composition of long-chain alkanes and  
746 alkan-1-ols in C4 grass waxes. *Org Geochem*. 2006;37: 1303–1332.

- 747 doi:10.1016/j.orggeochem.2005.12.013
- 748 68. Otto A, Simpson MJ. Degradation and Preservation of Vascular Plant-derived Biomarkers in  
749 Grassland and Forest Soils from Western Canada. *Biogeochemistry*. 2005;74: 377–409.  
750 doi:10.1007/s10533-004-5834-8
- 751 69. Han J, Calvin M. Hydrocarbon Distribution of Algae and Bacteria, and Microbiological  
752 Activity in Sediments. *Proc Natl Acad Sci*. 1969;64: 436–443. doi:10.1073/pnas.64.2.436
- 753 70. Jansen B, Nierop KGJ, Hageman JA, Cleef AM, Verstraten JM. The straight-chain lipid  
754 biomarker composition of plant species responsible for the dominant biomass production along  
755 two altitudinal transects in the Ecuadorian Andes. *Org Geochem*. 2006;37: 1514–1536.  
756 doi:10.1016/j.orggeochem.2006.06.018
- 757 71. Schäfer IK, Lanny V, Franke J, Eglinton TI, Zech M, Vysloužilová B, et al. Leaf waxes in  
758 litter and topsoils along a European transect. *SOIL*. 2016;2: 551–564. doi:10.5194/soil-2-551-  
759 2016
- 760 72. Franich RA, Goodin SJ, Volkman JK. Alkyl esters from *pinus radiata* foliage epicuticular wax.  
761 *Phytochemistry*. 1985;24: 2949–2952. doi:10.1016/0031-9422(85)80033-9
- 762 73. Sümmechen P, Markstädter C, Wienhaus O. Composition of the Epicuticular Wax Esters of  
763 *Picea abies* (L.) Karst. *Zeitschrift für Naturforsch C*. 1995;50: 11–14. doi:10.1515/znc-1995-1-  
764 203
- 765 74. Koch K, Ensikat H-J. The hydrophobic coatings of plant surfaces: Epicuticular wax crystals  
766 and their morphologies, crystallinity and molecular self-assembly. *Micron*. 2008;39: 759–772.  
767 doi:10.1016/j.micron.2007.11.010
- 768 75. Cranwell PA, Volkman JK. Alkyl and steryl esters in a recent lacustrine sediment. *Chem Geol*.  
769 1981;32: 29–43. doi:10.1016/0009-2541(81)90126-1
- 770 76. van Bergen PF, Bull ID, Poulton PR, Evershed RP. Organic geochemical studies of soils from  
771 the Rothamsted Classical Experiments—I. Total lipid extracts, solvent insoluble residues and  
772 humic acids from Broadbalk Wilderness. *Org Geochem*. 1997;26: 117–135.  
773 doi:10.1016/S0146-6380(96)00134-9
- 774 77. Lihavainen J, Ahonen V, Keski-Saari S, Söber A, Oksanen E, Keinänen M. Low vapor



- 775 pressure deficit reduces glandular trichome density and modifies the chemical composition of  
776 cuticular waxes in silver birch leaves. *Tree Physiol.* 2017;37: 1166–1181.  
777 doi:10.1093/treephys/tpx045
- 778 78. Zech M, Andreev A, Zech R, Müller S, Hambach U, Frechen M, et al. Quaternary vegetation  
779 changes derived from a loess-like permafrost palaeosol sequence in northeast Siberia using  
780 alkane biomarker and pollen analyses. *Boreas.* 2010;39: 540–550. doi:10.1111/j.1502-  
781 3885.2009.00132.x
- 782 79. Tarasov PE, Müller S, Zech M, Andreeva D, Diekmann B, Leipe C. Last glacial vegetation  
783 reconstructions in the extreme-continental eastern Asia: Potentials of pollen and n-alkane  
784 biomarker analyses. *Quat Int.* 2013;290–291: 253–263. doi:10.1016/j.quaint.2012.04.007
- 785 80. Berke MA, Cartagena Sierra A, Bush R, Cheah D, O'Connor K. Controls on leaf wax  
786 fractionation and  $\delta^2\text{H}$  values in tundra vascular plants from western Greenland. *Geochim*  
787 *Cosmochim Acta.* 2019;244: 565–583. doi:10.1016/j.gca.2018.10.020
- 788 81. Mayes RW, Beresford NA, Lamb CS, Barnett CL, Howard BJ, Jones B-EV, et al. Novel  
789 approaches to the estimation of intake and bioavailability of radiocaesium in ruminants grazing  
790 forested areas. *Sci Total Environ.* 1994;157: 289–300. doi:10.1016/0048-9697(94)90592-4
- 791 82. Daniels WC, Russell JM, Giblin AE, Welker JM, Klein ES, Huang Y. Hydrogen isotope  
792 fractionation in leaf waxes in the Alaskan Arctic tundra. *Geochim Cosmochim Acta.*  
793 2017;213: 216–236. doi:10.1016/j.gca.2017.06.028
- 794 83. Ronkainen T, Väiliranta M, McClymont E, Biasi C, Salonen S, Fontana S, et al. A combined  
795 biogeochemical and palaeobotanical approach to study permafrost environments and past  
796 dynamics. *J Quat Sci.* 2015;30: 189–200. doi:10.1002/jqs.2763
- 797 84. Balascio NL, D'Andrea WJ, Gjerde M, Bakke J. Hydroclimate variability of High Arctic  
798 Svalbard during the Holocene inferred from hydrogen isotopes of leaf waxes. *Quat Sci Rev.*  
799 2018;183: 177–187. doi:10.1016/j.quascirev.2016.11.036
- 800 85. Rao SJ, Iason GR, Hulbert IA, Mayes RW, Racey PA. Estimating diet composition for  
801 mountain hares in newly established native woodland: development and application of plant-  
802 wax faecal markers. *Can J Zool.* 2003;81: 1047–1056. doi:10.1139/z03-093

- 803 86. Pagani M, Pedentchouk N, Huber M, Sluijs A, Schouten S, Brinkhuis H, et al. Arctic  
804 hydrology during global warming at the Palaeocene/Eocene thermal maximum. *Nature*.  
805 2006;442: 671–675. doi:10.1038/nature05043
- 806 87. Sachse D, Radke J, Gleixner G.  $\delta D$  values of individual n-alkanes from terrestrial plants along  
807 a climatic gradient – Implications for the sedimentary biomarker record. *Org Geochem*.  
808 2006;37: 469–483. doi:10.1016/j.orggeochem.2005.12.003
- 809 88. van den Bos V, Engels S, Bohncke SJP, Cerli C, Jansen B, Kalbitz K, et al. Late Holocene  
810 changes in vegetation and atmospheric circulation at Lake Uddelermeer (The Netherlands)  
811 reconstructed using lipid biomarkers and compound-specific  $\delta D$  analysis. *J Quat Sci*. 2018;33:  
812 100–111. doi:10.1002/jqs.3006
- 813 89. Dawson LA, Towers W, Mayes RW, Craig J, Väisänen RK, Waterhouse EC. The use of plant  
814 hydrocarbon signatures in characterizing soil organic matter. *Geol Soc London, Spec Publ*.  
815 2004;232: 269–276. doi:10.1144/GSL.SP.2004.232.01.24
- 816 90. Huang Y, Eglinton G, Ineson P, Bol R, Harkness DD. The effects of nitrogen fertilisation and  
817 elevated CO<sub>2</sub> on the lipid biosynthesis and carbon isotopic discrimination in birch seedlings  
818 (*Betula pendula*). *Plant Soil*. 1999;216: 35–45. doi:10.1023/A:1004771431093
- 819 91. Maffei M, Badino S, Bossi S. Chemotaxonomic significance of leaf wax n-alkanes in the  
820 Pinales (Coniferales). *J Biol Res (Thessaloniki, Greece)*. 2004;1: 3–19. Available:  
821 <http://www.auth.gr/jbr/papers20041/01-2004.pdf>
- 822 92. Rajčević N, Janačković P, Dodoš T, Tešević V, Marin PD. Biogeographic Variation of Foliar  
823 n- Alkanes of *Juniperus communis* var . *saxatilis* Pallas from the Balkans. *Chem Biodivers*.  
824 2014;11: 1923–1938. doi:10.1002/cbdv.201400048
- 825 93. Ali HAM, Mayes RW, Hector BL, Verma AK, Ørskov ER. The possible use of n-alkanes,  
826 long-chain fatty alcohols and long-chain fatty acids as markers in studies of the botanical  
827 composition of the diet of free-ranging herbivores. *J Agric Sci*. 2005;143: 85–95.  
828 doi:10.1017/S0021859605004958
- 829 94. Aichner B, Herzsuh U, Wilkes H. Influence of aquatic macrophytes on the stable carbon  
830 isotopic signatures of sedimentary organic matter in lakes on the Tibetan Plateau. *Org*

- 831 Geochem. 2010;41: 706–718. doi:10.1016/j.orggeochem.2010.02.002
- 832 95. Hoffmann B, Kahmen A, Cernusak LA, Arndt SK, Sachse D. Abundance and distribution of  
833 leaf wax n-alkanes in leaves of Acacia and Eucalyptus trees along a strong humidity gradient  
834 in northern Australia. Org Geochem. 2013;62: 62–67. doi:10.1016/j.orggeochem.2013.07.003
- 835 96. Eley YL, Hren MT. Reconstructing vapor pressure deficit from leaf wax lipid molecular  
836 distributions. Sci Rep. 2018;8: 3967. doi:10.1038/s41598-018-21959-w
- 837 97. Tipple BJ, Pagani M. Environmental control on eastern broadleaf forest species' leaf wax  
838 distributions and d/h ratios. Geochim Cosmochim Acta. 2013;111: 64–77.  
839 doi:10.1016/j.gca.2012.10.042
- 840 98. Kirkels FMSA, Jansen B, Kalbitz K. Consistency of plant-specific n- alkane patterns in  
841 plaggen ecosystems: A review. The Holocene. 2013;23: 1355–1368.  
842 doi:10.1177/0959683613486943
- 843 99. Elkington TT. Introgressive hybridization between *Betula nana* L. and *B. pubescens* Ehrh. in  
844 North-West Iceland. New Phytol. 1968;67: 109–118. doi:10.1111/j.1469-8137.1968.tb05459.x
- 845 100. Palme AE, Su Q, Palsson S, Lascoux M. Extensive sharing of chloroplast haplotypes among  
846 European birches indicates hybridization among *Betula pendula*, *B. pubescens* and *B. nana*.  
847 Mol Ecol. 2004;13: 167–178. doi:10.1046/j.1365-294X.2003.02034.x
- 848 101. Stammitti L, Derridj S, Garrec JP. Leaf epicuticular lipids of *Prunus laurocerasus*: importance  
849 of extraction methods. Phytochemistry. 1996;43: 45–48. doi:10.1016/0031-9422(96)00241-5

850

851

## 852 Supporting information

853 **S1 Figure.** Total ion chromatogram of a *Betula humilis* leaf with the most abundant components.

854 **S2 Figure.** Mass spectrum of a C<sub>44</sub> alkyl ester mixture (RCOOR') of *Betula humilis*. The  
855 diagnostic ions are shown for the acid fragments (RCO<sub>2</sub>H<sub>2</sub><sup>+</sup>) and the molecular ion (M<sup>+</sup>).

856

857 **S3 Table**

| Ester chain length | M <sup>+</sup> | Mass (μg/g d.w.) | Acid chain length | Alcohol chain length | Amount of isomer (μg/g d.w.) |
|--------------------|----------------|------------------|-------------------|----------------------|------------------------------|
| 38                 | 564            | 3.06             | 14                | 24                   | 0.78                         |
|                    |                |                  | 16                | 22                   | 2.28                         |
| 40                 | 592            | 17.1             | 14                | 26                   | 1.05                         |
|                    |                |                  | 16                | 24                   | 10.0                         |
|                    |                |                  | 18                | 22                   | 4.95                         |
|                    |                |                  | 20                | 20                   | 1.20                         |
| 42                 | 620            | 58.9             | 14                | 28                   | 1.73                         |
|                    |                |                  | 16                | 26                   | 11.8                         |
|                    |                |                  | 18                | 24                   | 22.9                         |
|                    |                |                  | 20                | 22                   | 21.9                         |
|                    |                |                  | 22                | 20                   | 0.16                         |
|                    |                |                  | 24                | 18                   | 0.34                         |
| 44                 | 648            | 104.2            | 14                | 30                   | 0.60                         |
|                    |                |                  | 16                | 28                   | 14.6                         |
|                    |                |                  | 18                | 26                   | 14.4                         |
|                    |                |                  | 20                | 24                   | 63.4                         |
|                    |                |                  | 22                | 22                   | 10.4                         |
|                    |                |                  | 24                | 20                   | 0.78                         |
| 46                 | 676            | 52.8             | 14                | 32                   | 0.13                         |
|                    |                |                  | 16                | 30                   | 1.99                         |
|                    |                |                  | 18                | 28                   | 8.54                         |
|                    |                |                  | 20                | 26                   | 27.9                         |
|                    |                |                  | 22                | 24                   | 11.4                         |
|                    |                |                  | 24                | 22                   | 2.86                         |
| 48                 | 704            | 22.1             | 20                | 28                   | 16.1                         |
|                    |                |                  | 22                | 26                   | 2.35                         |
|                    |                |                  | 24                | 24                   | 3.62                         |

**S4 Table**

| Ester chain length | M+  | Mass ( $\mu\text{g/g}$ d.w.) | Acid chain length | Alcohol chain length | Amount of isomer ( $\mu\text{g/g}$ d.w.) |
|--------------------|-----|------------------------------|-------------------|----------------------|------------------------------------------|
| 36                 | 536 | 1047                         | 14                | 22                   | 6.5                                      |
|                    |     |                              | 16                | 20                   | 1040                                     |
| 38                 | 564 | 601                          | 14                | 24                   | 7.5                                      |
|                    |     |                              | 16                | 22                   | 420                                      |
|                    |     |                              | 18                | 20                   | 173                                      |
| 40                 | 592 | 532                          | 14                | 26                   | 3.0                                      |
|                    |     |                              | 16                | 24                   | 254                                      |
|                    |     |                              | 18                | 22                   | 123                                      |
|                    |     |                              | 20                | 20                   | 150                                      |
| 42                 | 620 | 310                          | 14                | 28                   | 2.4                                      |
|                    |     |                              | 16                | 26                   | 57.7                                     |
|                    |     |                              | 18                | 24                   | 57.9                                     |
|                    |     |                              | 20                | 22                   | 147                                      |
|                    |     |                              | 22                | 20                   | 44.7                                     |
| 44                 | 648 | 180                          | 16                | 28                   | 39.7                                     |
|                    |     |                              | 18                | 26                   | 10.9                                     |
|                    |     |                              | 20                | 24                   | 59.2                                     |
|                    |     |                              | 22                | 22                   | 49.3                                     |
|                    |     |                              | 24                | 20                   | 21.1                                     |
| 46                 | 676 | 70                           | 16                | 30                   | 6.9                                      |
|                    |     |                              | 18                | 28                   | 5.6                                      |
|                    |     |                              | 20                | 26                   | 10.2                                     |
|                    |     |                              | 22                | 24                   | 16.6                                     |
|                    |     |                              | 24                | 22                   | 11.3                                     |
|                    |     |                              | 26                | 20                   | 19.8                                     |
| 48                 | 704 | 35                           | 16                | 32                   | 3.62                                     |
|                    |     |                              | 20                | 28                   | 6.03                                     |
|                    |     |                              | 24                | 24                   | 4.95                                     |
|                    |     |                              | 26                | 22                   | 6.18                                     |
|                    |     |                              | 28                | 20                   | 14.2                                     |

858

859

860

## S5 Table

| Ester chain length | M+  | Mass ( $\mu\text{g/g d.w.}$ ) | Acid chain length | Alcohol chain length | Amount of isomer ( $\mu\text{g/g d.w.}$ ) |
|--------------------|-----|-------------------------------|-------------------|----------------------|-------------------------------------------|
| 38                 | 564 | 535.74                        | 14                | 24                   | 13.6                                      |
|                    |     |                               | 16                | 22                   | 519                                       |
|                    |     |                               | 18                | 20                   | 2.73                                      |
|                    |     |                               | 20                | 18                   | 0.57                                      |
| 40                 | 592 | 290.49                        | 14                | 26                   | 7.29                                      |
|                    |     |                               | 16                | 24                   | 208                                       |
|                    |     |                               | 18                | 22                   | 71.5                                      |
|                    |     |                               | 20                | 20                   | 4.06                                      |
| 42                 | 620 | 147.36                        | 14                | 28                   | 4.85                                      |
|                    |     |                               | 16                | 26                   | 67.3                                      |
|                    |     |                               | 18                | 24                   | 22.8                                      |
|                    |     |                               | 20                | 22                   | 52.4                                      |
| 44                 | 648 | 68.44                         | 16                | 28                   | 39.7                                      |
|                    |     |                               | 18                | 26                   | 9.65                                      |
|                    |     |                               | 20                | 24                   | 19.0                                      |

861

862

863

864

865

866

867

868

869

870

871

872

873

874

**S6 Table**

| Ester chain length | M+  | Mass (µg/g d.w.) | Acid chain length | Alcohol chain length | Amount of isomer (µg/g d.w.) |
|--------------------|-----|------------------|-------------------|----------------------|------------------------------|
| 38                 | 564 | 122.7            | 14                | 24                   | 31.3                         |
|                    |     |                  | 16                | 22                   | 91.5                         |
| 40                 | 592 | 101.7            | 14                | 26                   | 6.20                         |
|                    |     |                  | 16                | 24                   | 59.1                         |
|                    |     |                  | 18                | 22                   | 29.3                         |
|                    |     |                  | 20                | 20                   | 7.08                         |
| 42                 | 620 | 73.6             | 14                | 28                   | 2.16                         |
|                    |     |                  | 16                | 26                   | 14.7                         |
|                    |     |                  | 18                | 24                   | 28.7                         |
|                    |     |                  | 20                | 22                   | 27.4                         |
|                    |     |                  | 22                | 20                   | 0.20                         |
|                    |     |                  | 24                | 18                   | 0.42                         |
| 44                 | 648 | 42.7             | 14                | 30                   | 0.25                         |
|                    |     |                  | 16                | 28                   | 5.98                         |
|                    |     |                  | 18                | 26                   | 5.92                         |
|                    |     |                  | 20                | 24                   | 26.0                         |
|                    |     |                  | 22                | 22                   | 4.26                         |
|                    |     |                  | 24                | 20                   | 0.32                         |
| 46                 | 676 | 13.9             | 14                | 32                   | 0.03                         |
|                    |     |                  | 16                | 30                   | 0.52                         |
|                    |     |                  | 18                | 28                   | 2.25                         |
|                    |     |                  | 20                | 26                   | 7.36                         |
|                    |     |                  | 22                | 24                   | 3.01                         |
|                    |     |                  | 24                | 22                   | 0.75                         |

875

876

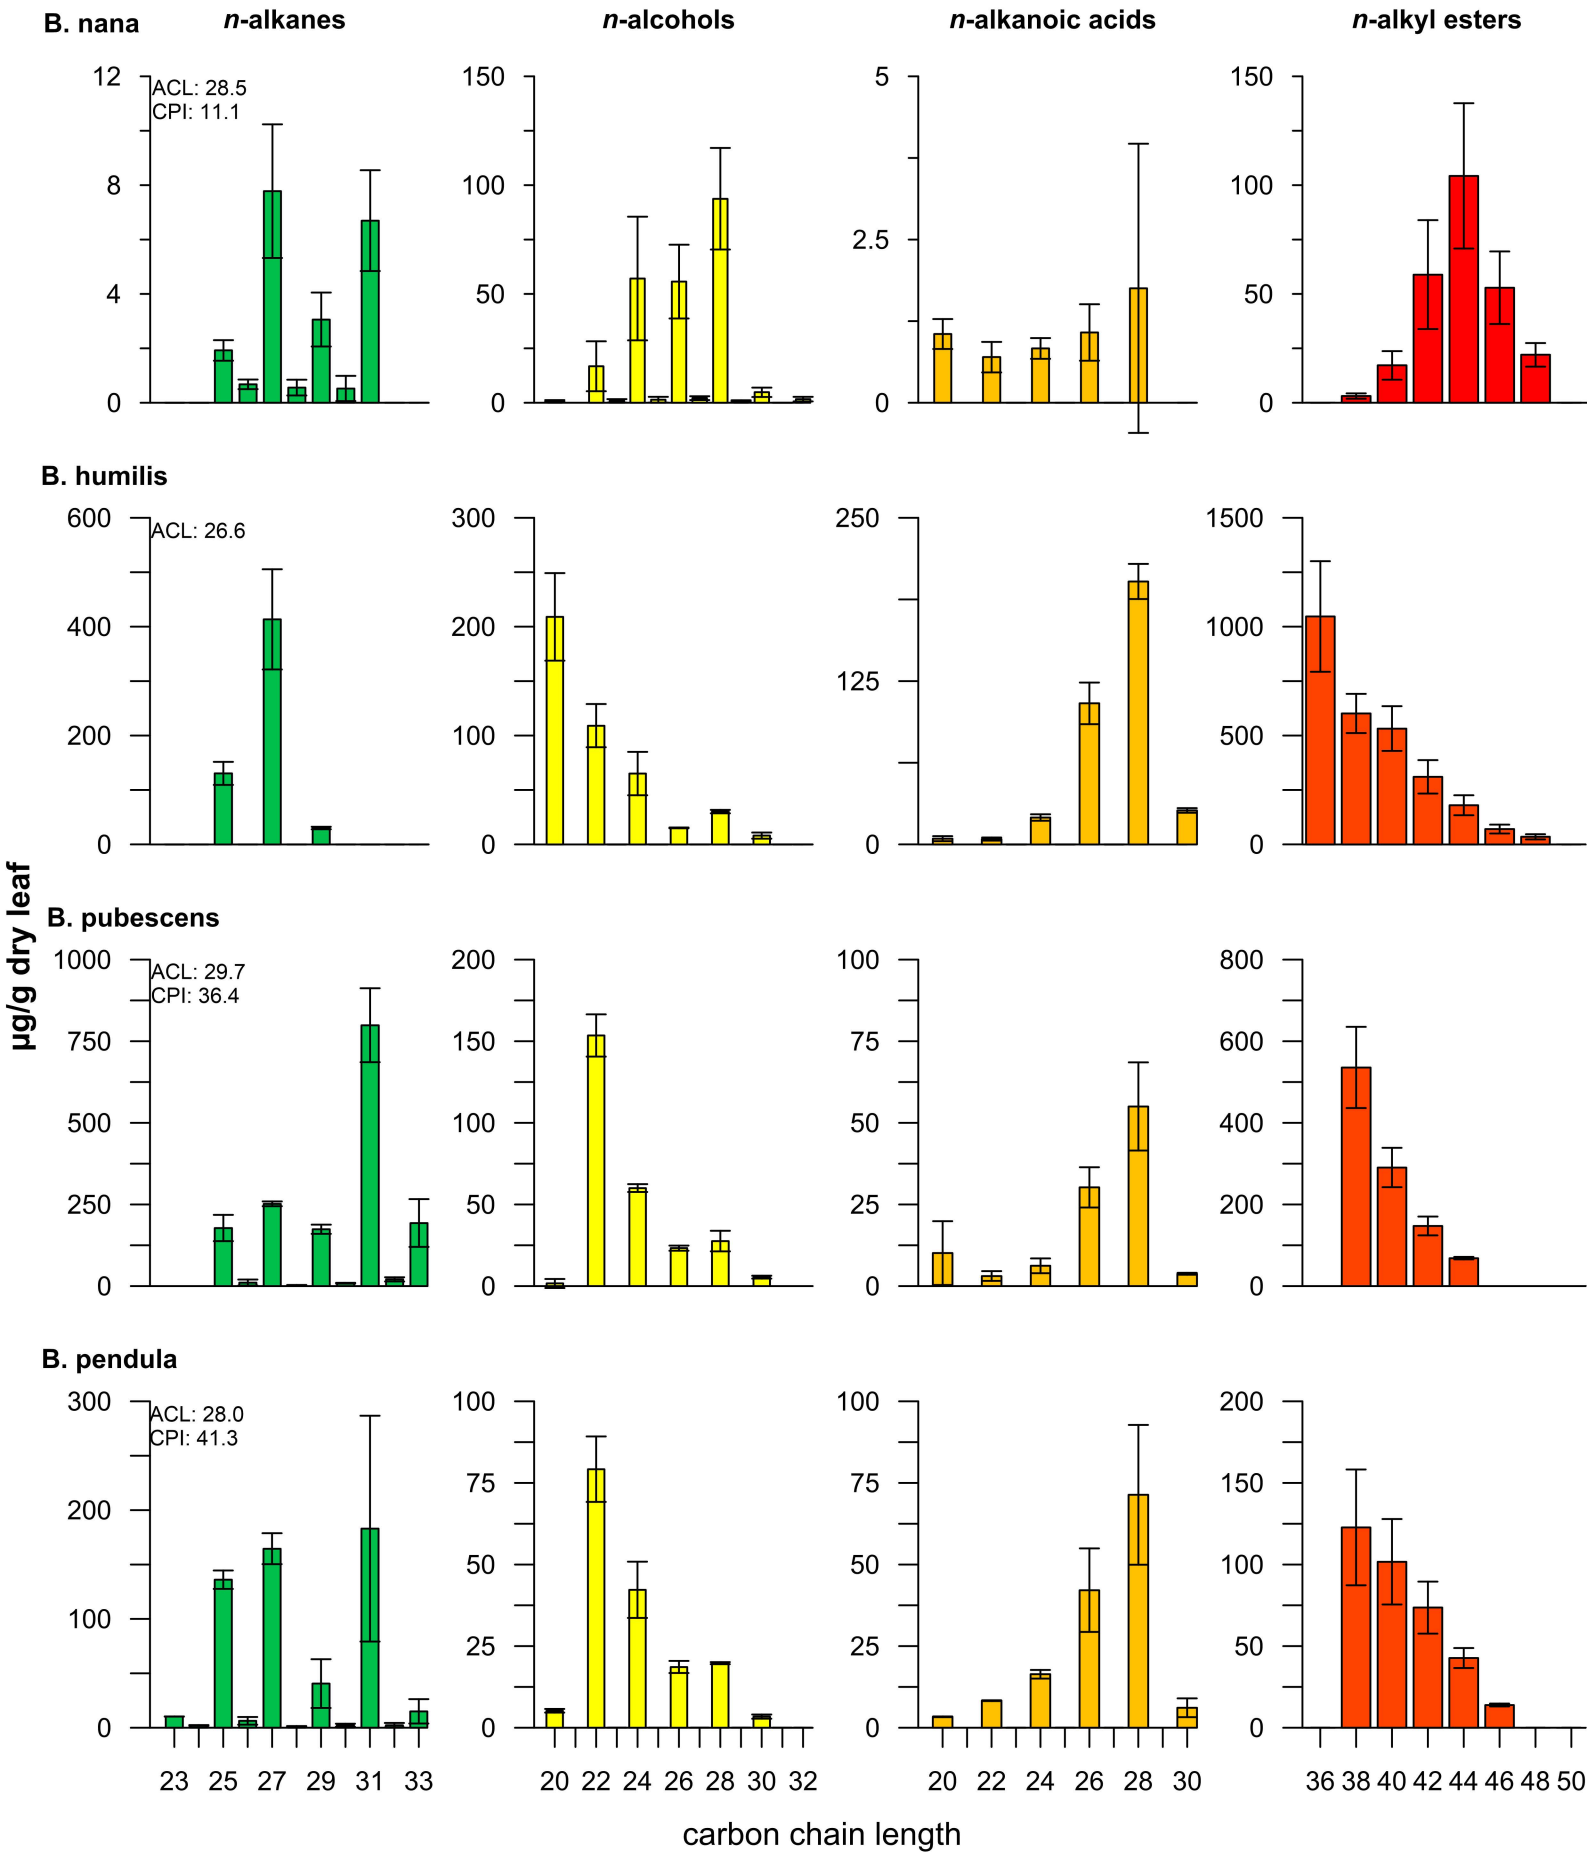



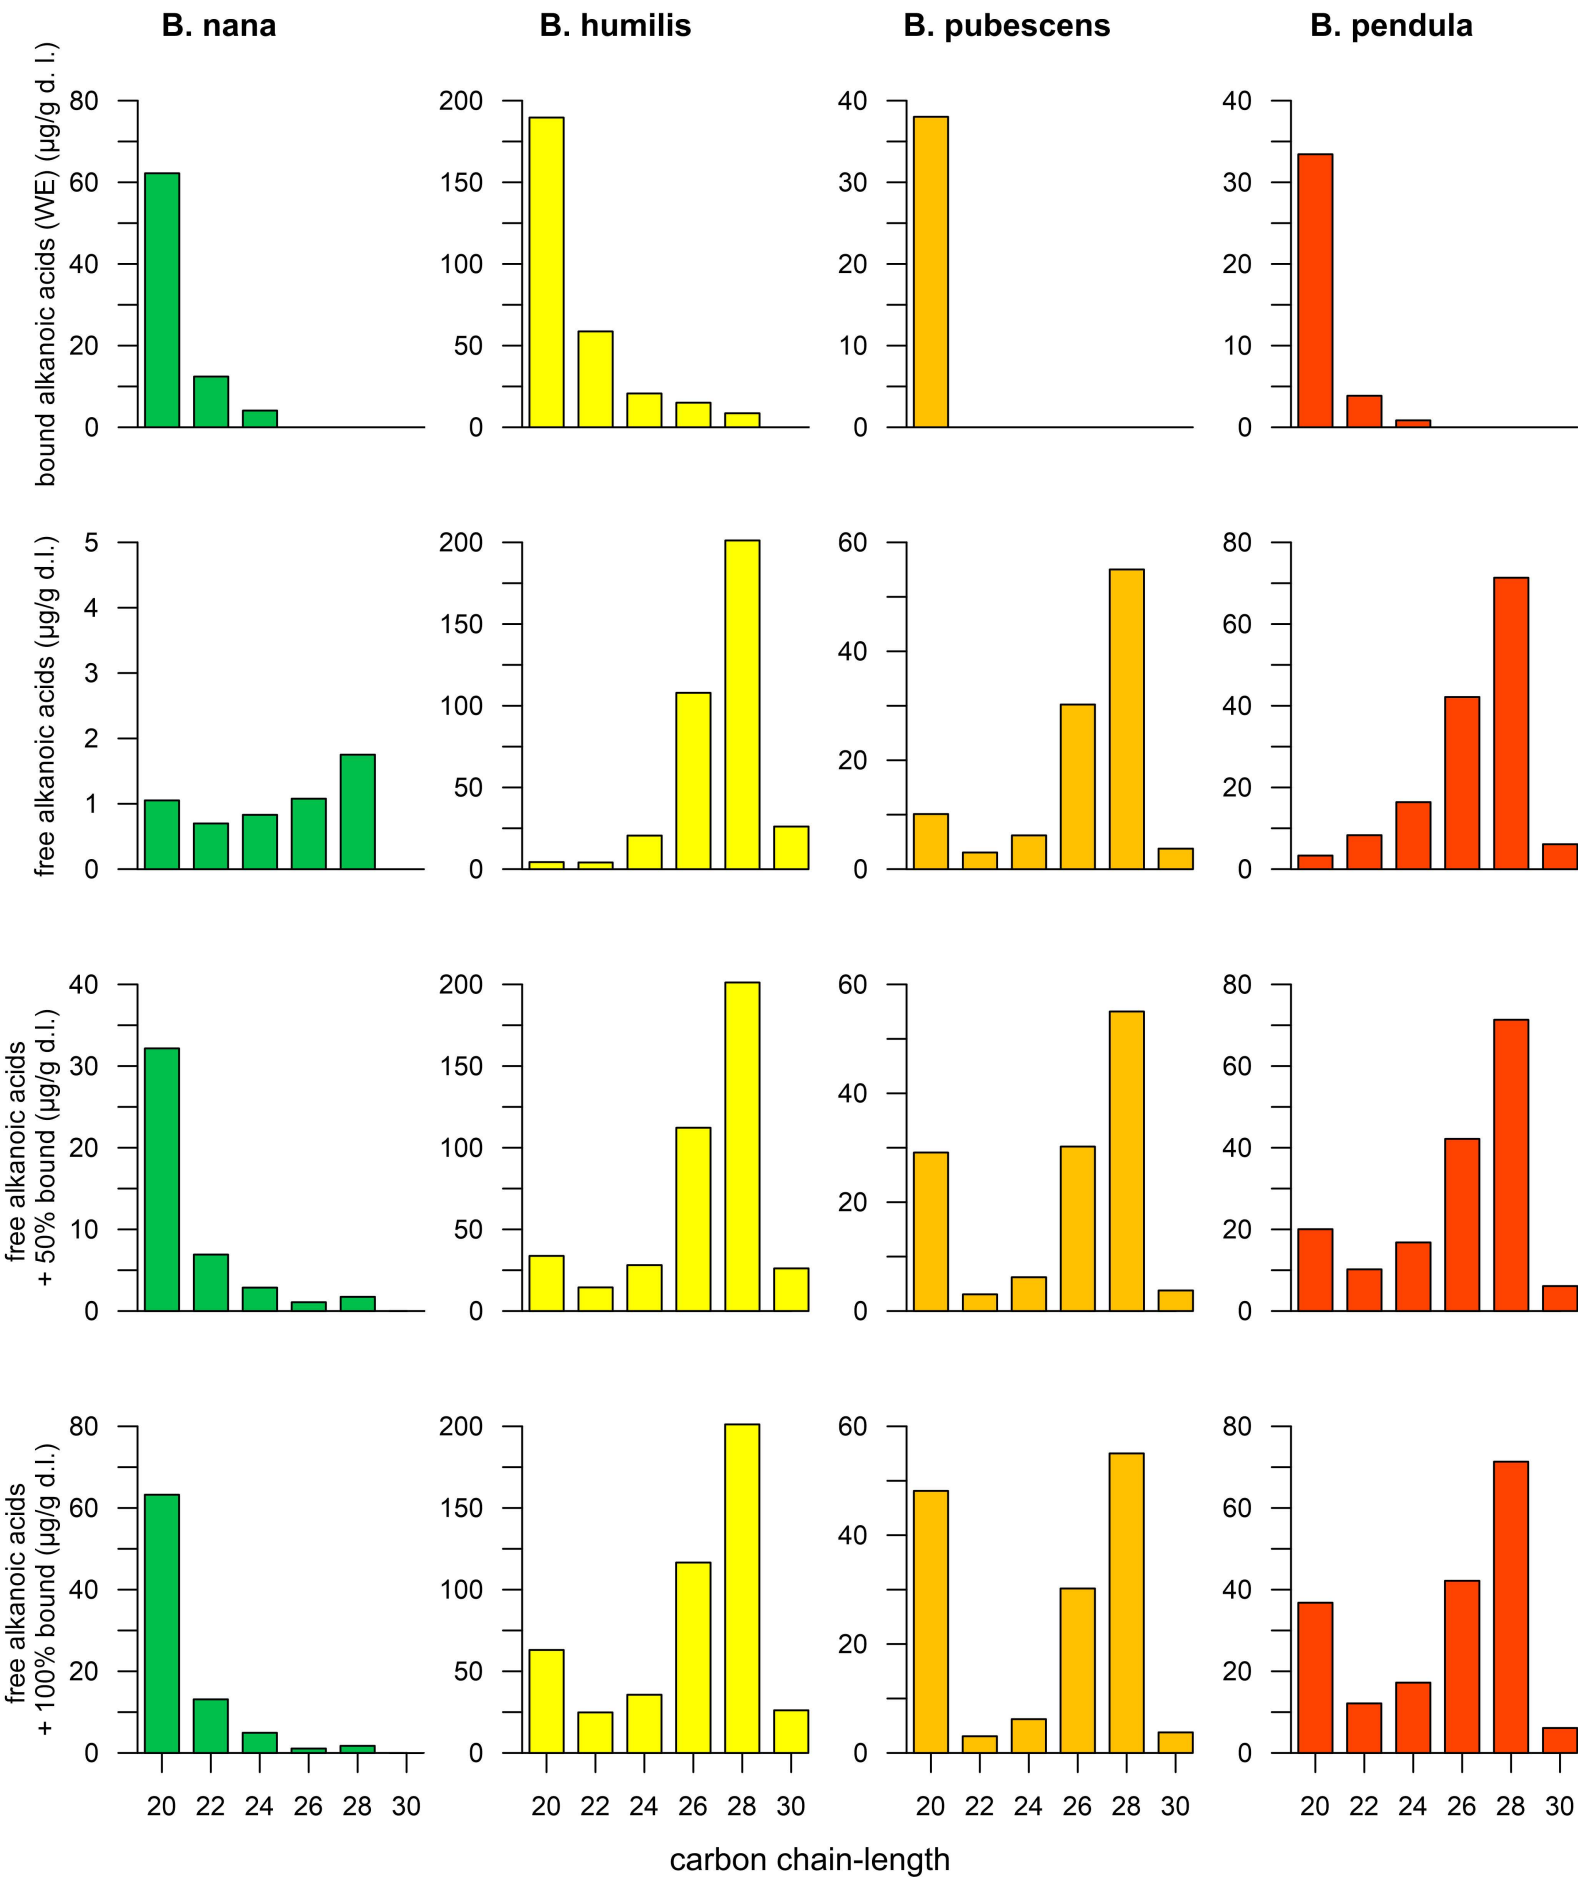

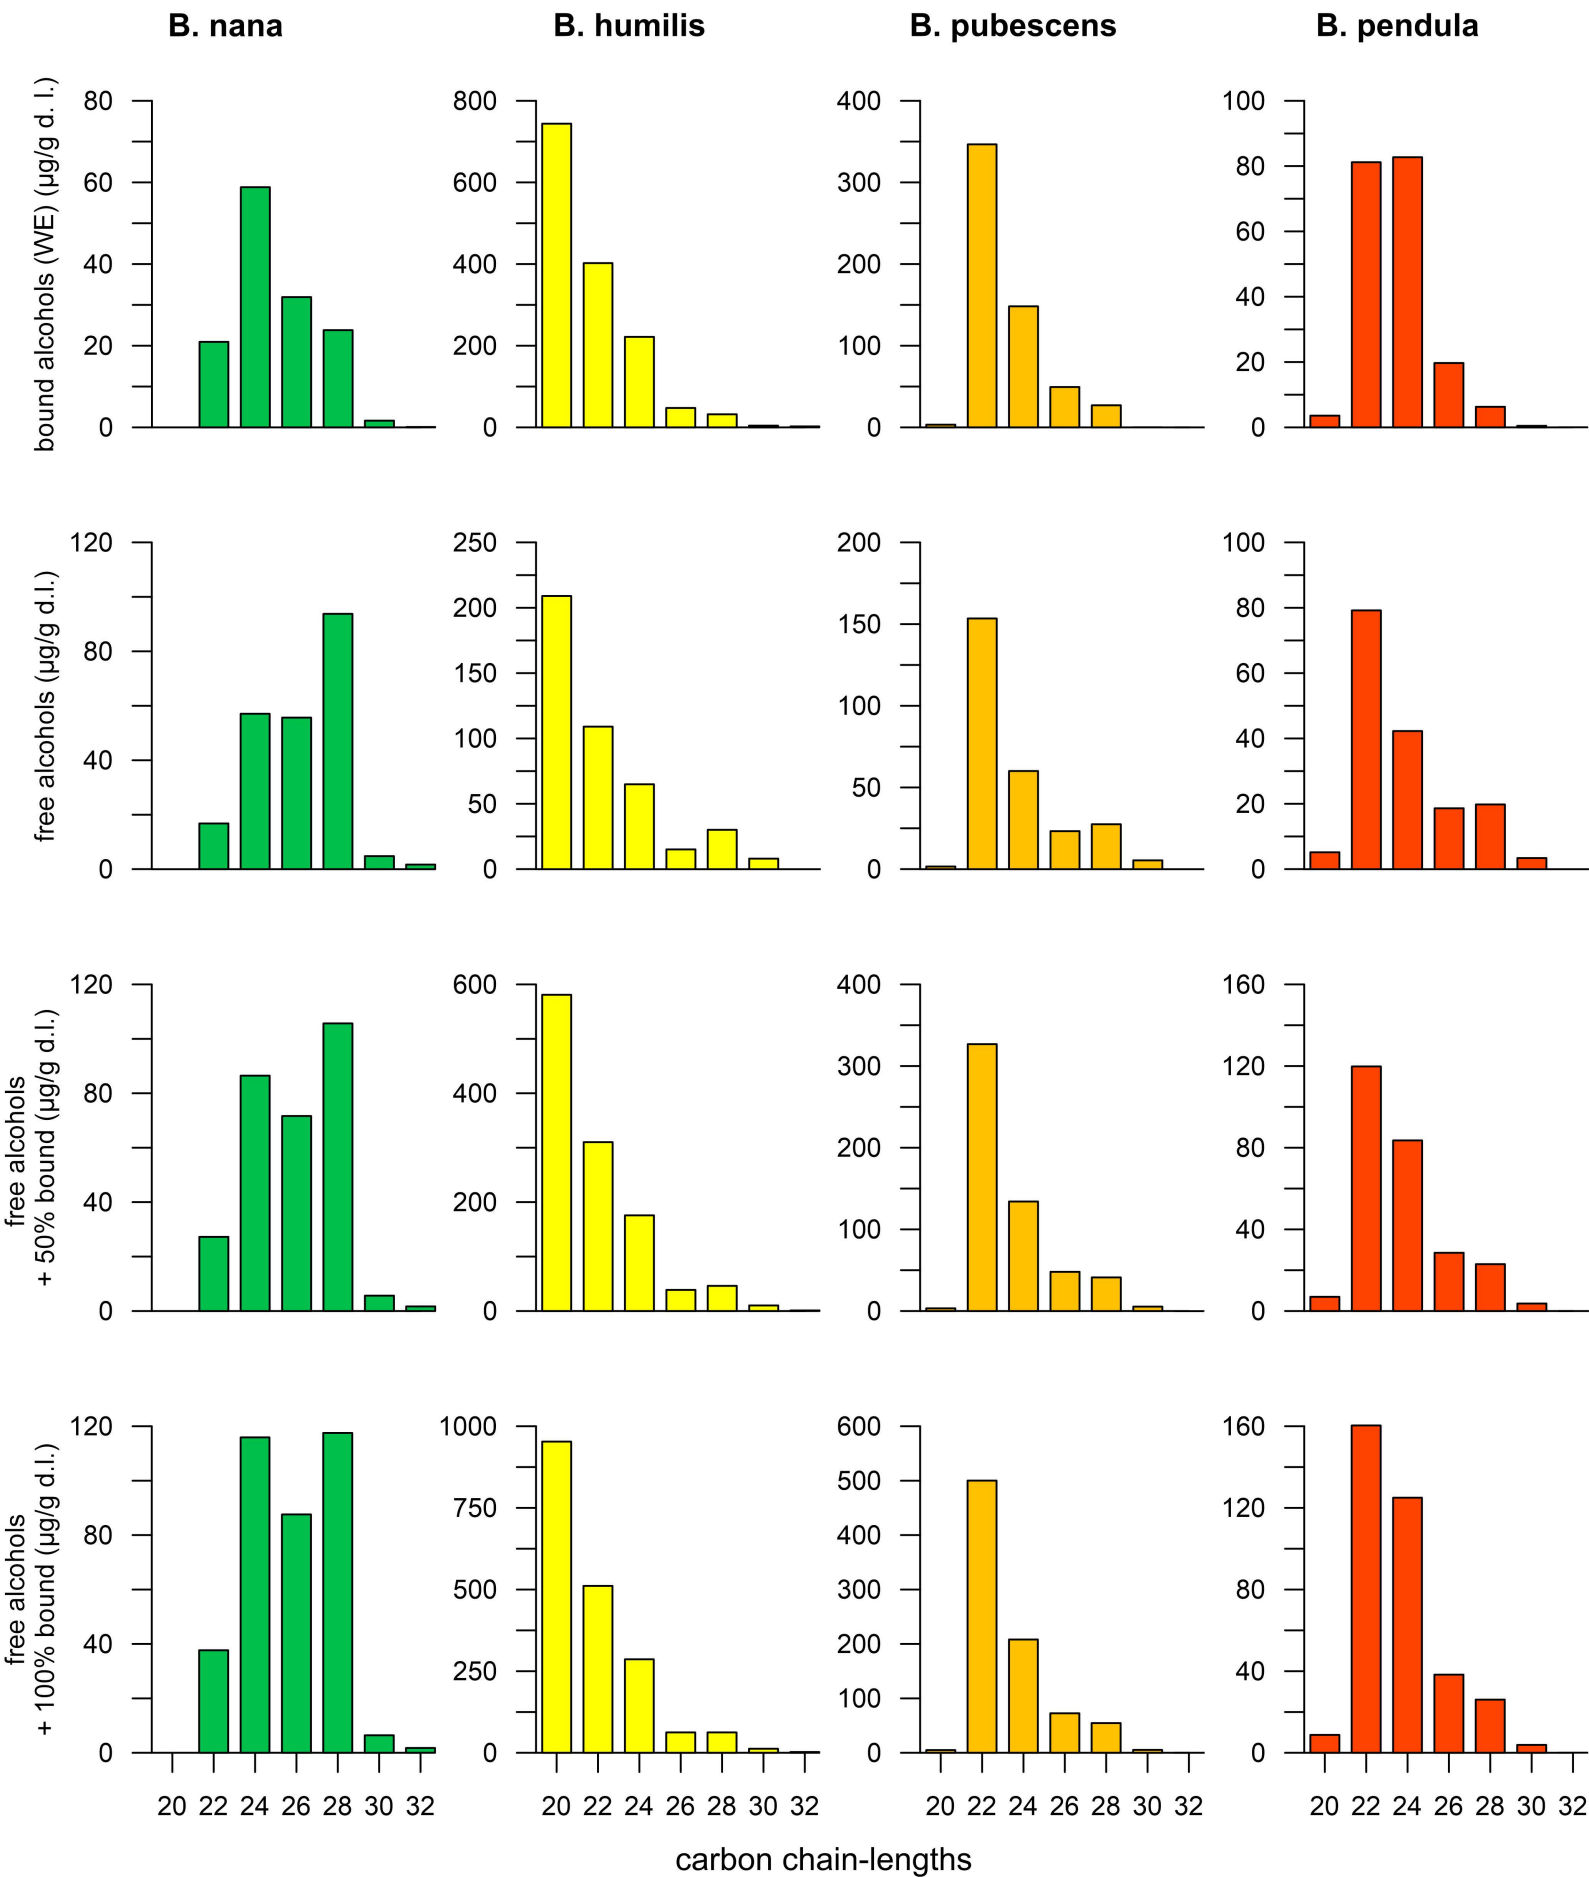

**B. nana**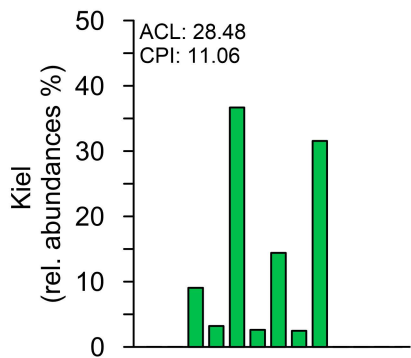**B. humilis**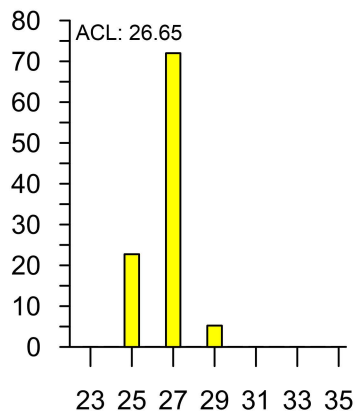**B. pubescens**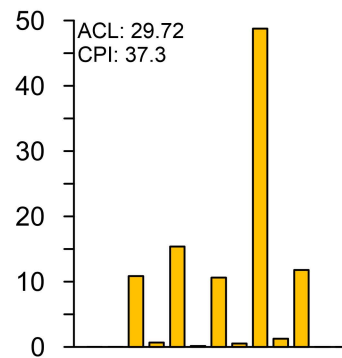**B. pendula**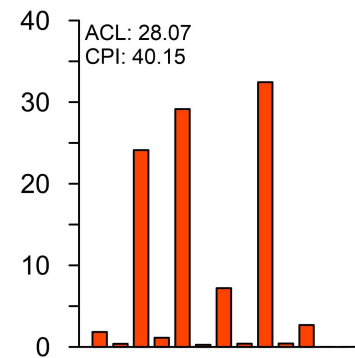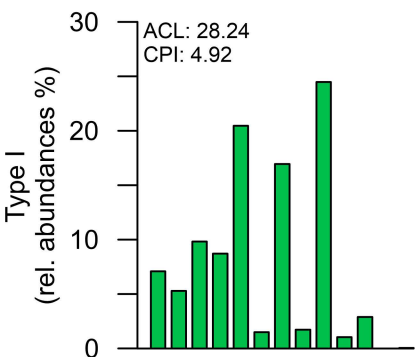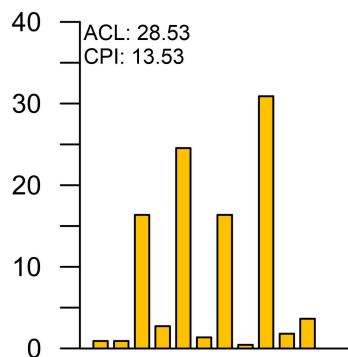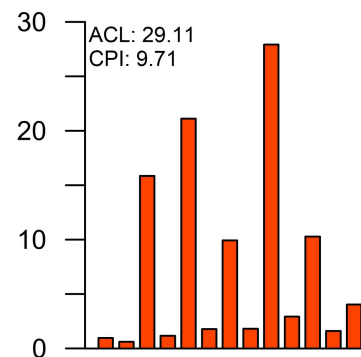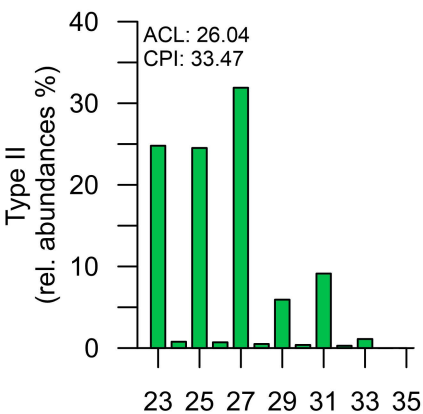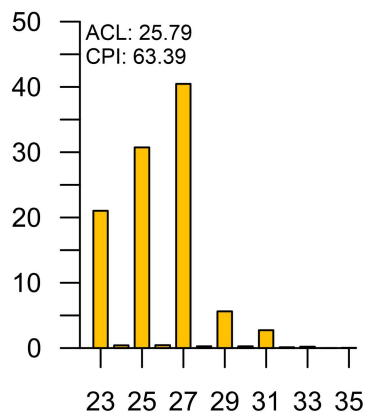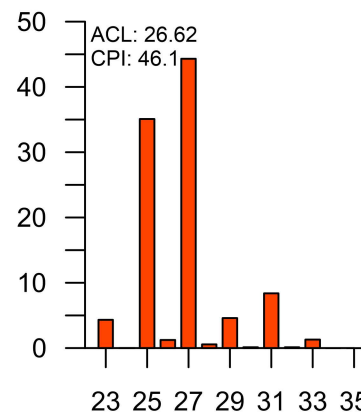

carbon chain-lengths

# wax lipid discrimination tree

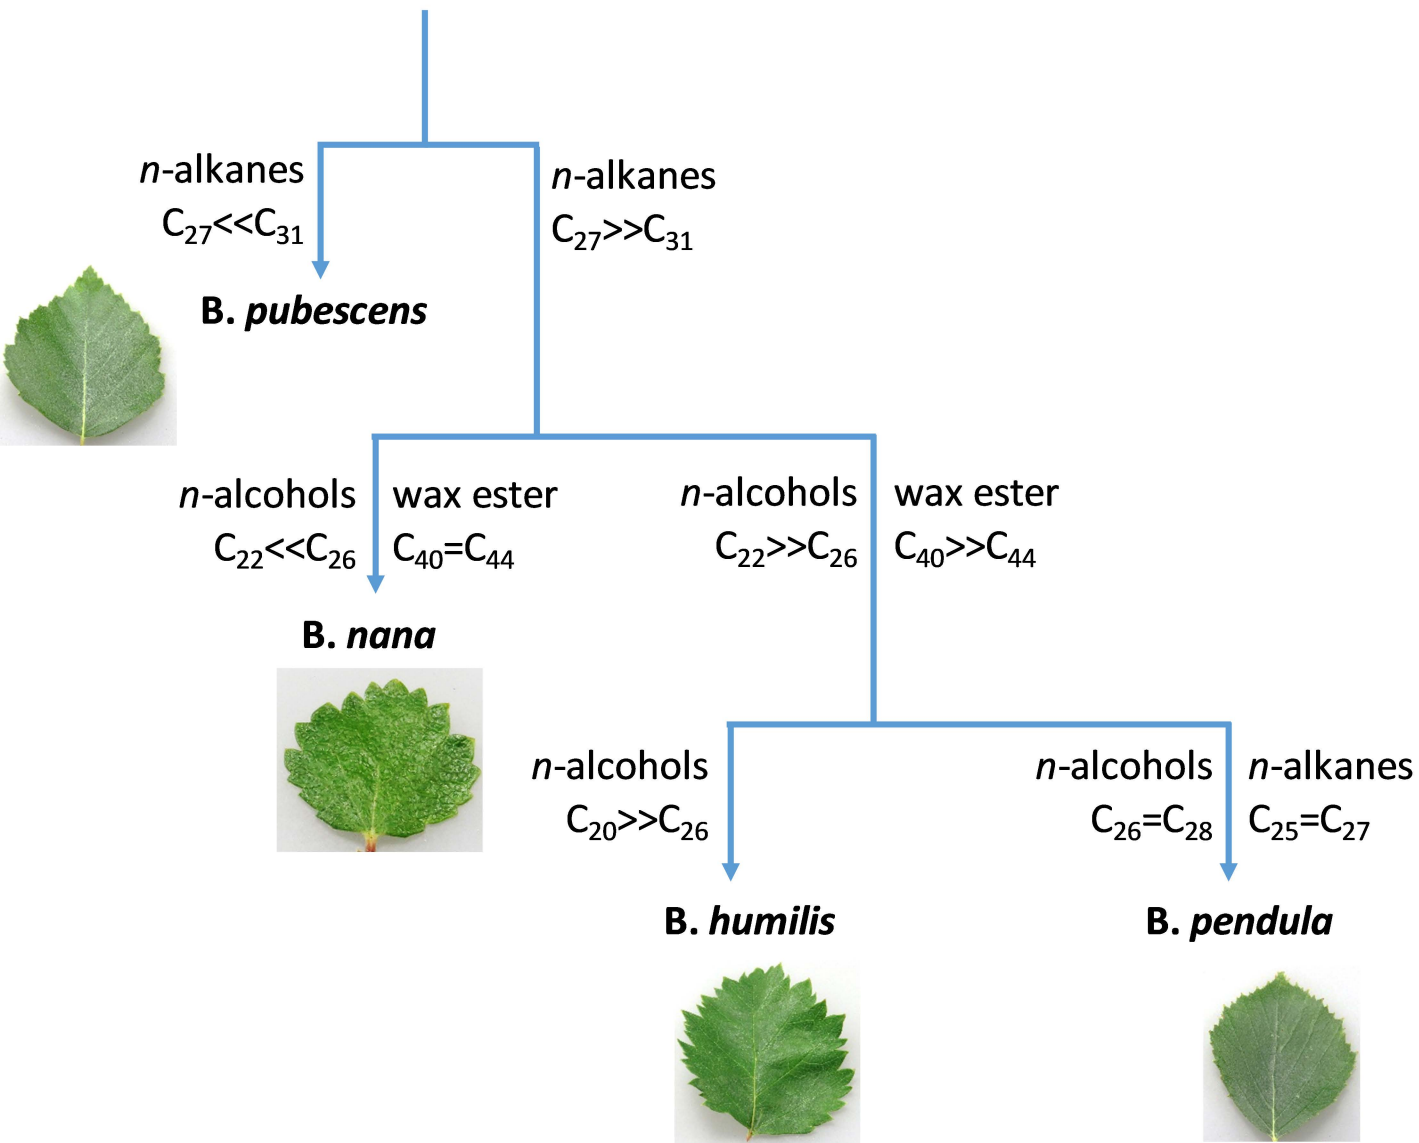

100

TIC: *Betula humilis*

- ◆ alkane
- ▲ alcohol
- alkanolic acid
- ★ alkyl ester

Relative abundance (%)

0

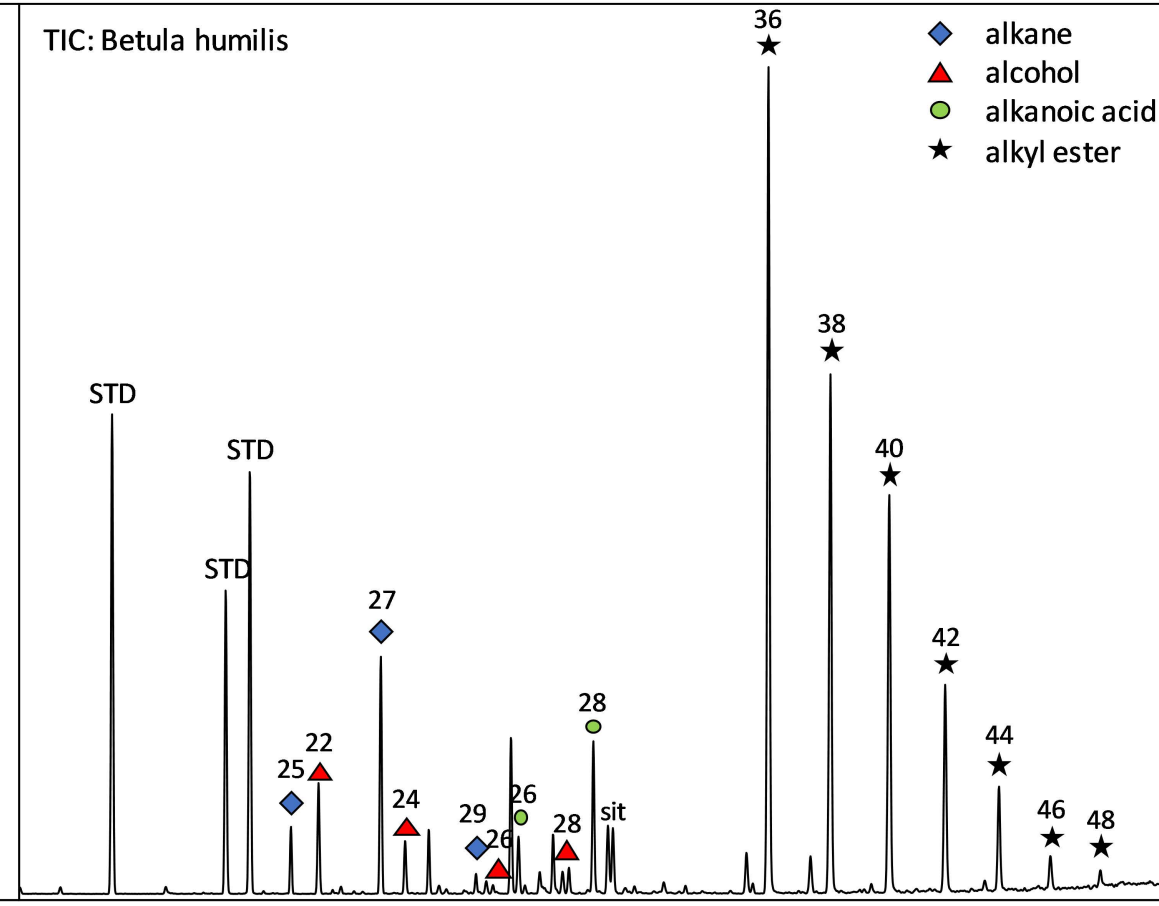

100

WE 44

313

Relative abundance (%)

341

257

369

57

97

139

229

285

M+  
648

0

50

100

150

200

250

300

350

400

450

500

550

600

650
